# Supplementary material for: In situ molecular imaging of adsorbed protein films in water indicating hydrophobicity and hydrophilicity
Source: PubMed Central journal article supplement (PMC7048838; doi:10.1038/s41598-020-60428-1), 2020-02-28
Supplement: 41598_2020_60428_MOESM1_ESM.pdf [file 41598_2020_60428_MOESM1_ESM.pdf]

***In situ* molecular imaging of adsorbed protein films in water indicating  
hydrophobicity and hydrophilicity**

Jiachao Yu,<sup>abd</sup> Yufan Zhou,<sup>c</sup> Mark Engelhard,<sup>c</sup> Yuchen Zhang,<sup>b</sup> Jiyoung Son,<sup>b</sup> Songqin Liu,<sup>\*a</sup>

Zihua Zhu,<sup>\*c</sup> and Xiao-Ying Yu<sup>\*b</sup>

<sup>a</sup> *Jiangsu Province Hi-Tech Key Laboratory for Bio-medical Research, School of Chemistry and Chemical Engineering, Southeast University, Nanjing 210096, China. E-mail: liusq@seu.edu.cn*

<sup>b</sup> *Energy and Environment Directorate, Pacific Northwest National Laboratory, Richland, WA 99354, USA. E-mail: xiaoying.yu@pnl.gov*

<sup>c</sup> *Environmental Molecular Sciences Laboratory, Pacific Northwest National Laboratory, Richland, WA 99354, USA. E-mail: zihua.zhu@pnl.gov*

<sup>d</sup> *Department of Chemistry, School of Science, Zhejiang Sci-Tech University, Hangzhou 310018, China.*

## Table of Contents

|                                                                                                                                                                                                                                                                                                                                                            |    |
|------------------------------------------------------------------------------------------------------------------------------------------------------------------------------------------------------------------------------------------------------------------------------------------------------------------------------------------------------------|----|
| EXPERIMENTAL DETAILS .....                                                                                                                                                                                                                                                                                                                                 | 1  |
| SALVI Device Fabrication .....                                                                                                                                                                                                                                                                                                                             | 1  |
| Hydrated Protein Film Immobilization on the SiN Membrane .....                                                                                                                                                                                                                                                                                             | 1  |
| ToF-SIMS Measurement .....                                                                                                                                                                                                                                                                                                                                 | 1  |
| XPS Experimental Description .....                                                                                                                                                                                                                                                                                                                         | 2  |
| SUPPLEMENTARY FIGURES.....                                                                                                                                                                                                                                                                                                                                 | 3  |
| <b>Fig. S1</b> ToF-SIMS spectra (m/z 1-200) of six samples: (a) BSA, (b) collagen, (c) fibronectin, (d) laminin, (e) vitronectin, (f) pure water in the negative ion mode. Water clusters were marked with blue labels. ....                                                                                                                               | 3  |
| <b>Fig. S2</b> ToF-SIMS spectra (m/z 201-750) of six samples: (a) BSA, (b) collagen, (c) fibronectin, (d) laminin, (e) vitronectin, (f) pure water in the positive ion mode. Water clusters were marked with green labels. ....                                                                                                                            | 4  |
| <b>Fig. S3</b> ToF-SIMS spectra (m/z 201-750) of six samples: (a) BSA, (b) collagen, (c) fibronectin, (d) laminin, (e) vitronectin, (f) pure water in the negative ion mode. Water clusters were marked with blue labels. ....                                                                                                                             | 5  |
| <b>Fig. S4</b> ToF-SIMS spectra (m/z 1-200) of (a) hydrated BSA film and (b) dry BSA in the positive ion mode. Amino acid fragments were marked with red labels.....                                                                                                                                                                                       | 6  |
| <b>Fig. S5</b> ToF-SIMS spectra of hydrated vitronectin film at six different locations: (a), (b), (c) in the positive ion mode and (d), (e), (f) in the negative ion mode. Amino acid fragments were marked with red labels, water clusters were marked with green (in the positive ion mode) and blue (in the negative ion mode) labels. ....            | 7  |
| <b>Fig. S6</b> Spectral PCA results of six protein samples. (a) PC1 (68%) loading of amino acid fragments (red) and water clusters (green) depicted in Fig. 2 and S2, (b) PC1 (68%) score plot in the positive ion mode; (c) PC1 (91%) loading of water clusters (blue) depicted in Fig. S1 and S3, (d) PC1 (91%) score plot in the negative ion mode..... | 8  |
| <b>Fig. S7</b> Quantitative XPS analysis results of dry protein films. ....                                                                                                                                                                                                                                                                                | 9  |
| <b>Fig. S8</b> Comparison of selected (a) amino acid fragments, (b) positive water clusters and (c) negative water clusters in five hydrated protein films and pure water. ....                                                                                                                                                                            | 10 |
| <b>Fig. S9</b> Comparison bar plots showing the hydrophobic to hydrophilic amino acid ratios obtained from in situ liquid SIMS in this work. ....                                                                                                                                                                                                          | 11 |
| <b>Fig. S10</b> 3D reconstructed images from a) absolute counts and b) relative counts normalized to the total ion intensities. ....                                                                                                                                                                                                                       | 13 |
| <b>Fig. S11</b> 3D reconstructed images of the laminin protein film: a) normalized to H <sup>+</sup> or H <sup>-</sup> counts and b) normalized to the total ion intensities.....                                                                                                                                                                          | 14 |

|                                                                                                                                                                                 |    |
|---------------------------------------------------------------------------------------------------------------------------------------------------------------------------------|----|
| <b>Fig. S12</b> PCA results of six samples. (a) PC1 (73%) loadings of amino acid fragments (red) and water clusters (green), (b) PC1 (73%) scores of six samples.....           | 15 |
| <b>Fig. S13a</b> ToF-SIMS spectra of 9 water replicates. Only water clusters were selected and showed, the intensities were normalized to sum of selected peak intensities..... | 16 |
| <b>Fig. S13b</b> ToF-SIMS spectra of 9 laminin replicates. The intensities were normalized to the total ion intensity.....                                                      | 17 |
| <b>Fig. S14a.</b> Depth profiling measurement of the Laminin in the positive mode. ....                                                                                         | 18 |
| <b>Fig. S14b.</b> Depth profiling measurement of the Laminin with trehalose coating in the positive mode.....                                                                   | 19 |
| <b>Fig. S15a.</b> Depth profiling measurement of the Vitronectin in the positive mode.....                                                                                      | 20 |
| <b>Fig. S15b.</b> Depth profiling measurement of the Vitronectin with trehalose coating in the positive mode.....                                                               | 21 |
| SUPPLEMENTARY TABLES .....                                                                                                                                                      | 24 |
| <b>Table S1</b> Water clusters observed in the positive and negative ion mode in this study.....                                                                                | 24 |
| <b>Table S2</b> Amino acid fragments observed in the positive ion mode in this study. ....                                                                                      | 25 |
| <b>Table S3</b> 95% confidence limits for all the PCA plots .....                                                                                                               | 26 |
| <b>Table S4</b> The relative abundance of PDMS in the liquid SIMS protein spectrum .....                                                                                        | 27 |
| <b>Table S5</b> The XPS determined composition of BSA, laminin, and vitronectin films absorbed onto clean Si substrates.....                                                    | 28 |
| MOVIE CAPTION.....                                                                                                                                                              | 29 |
| REFERENCES .....                                                                                                                                                                | 30 |

## EXPERIMENTAL DETAILS

### SALVI Device Fabrication

A schematic depicting the hydrated protein film adsorbed on the SiN membrane of SALVI is shown in Fig. 1a. The device was fabricated following the process described in previous papers.<sup>1-4</sup> Briefly, a polydimethylsiloxane (PDMS) block with a 200  $\mu\text{m}$  wide, 300  $\mu\text{m}$  deep and 2 mm long microchannel was made by soft lithography. A SiN membrane window consisting of a  $7.5 \times 7.5$  mm<sup>2</sup> silicon frame (200  $\mu\text{m}$  thickness) and a  $1.5 \times 1.5$  mm<sup>2</sup> SiN membrane (100 nm thickness) acquired from Norcada, Canada was used to form the detection area. The SiN membrane and the PDMS microchannel were irreversibly bonded after oxygen plasma treatment.

### Hydrated Protein Film Immobilization on the SiN Membrane

Five proteins including BSA (product number A4161), collagen (type IV, product number C8374), fibronectin (product number F1056), laminin (product number L6274) and vitronectin (product number V8379) were studied in this work, all purchased from Sigma-Aldrich, USA. The sterilization and cleaning of the SALVI microchannel was accomplished by washing it thoroughly with 1 mL of 70% ethanol solution and 1 mL of pure water (Milli-Q Advantage A10 Water Purification System, EMD Millipore, Germany), respectively, at a flow rate of 100  $\mu\text{L}/\text{min}$ . Then the microchannel was filled with 100  $\mu\text{L}$  of 10  $\mu\text{g}/\text{mL}$  protein solution (neutral pH) at a flow rate of 100  $\mu\text{L}/\text{min}$  and left incubated at room temperature for 12 hours.<sup>5</sup> Normally, a hydrated protein film would be immobilized in the microchannel,<sup>6-13</sup> as shown in Fig. 1a. The residual protein solution was removed by washing the channel with 1 mL of pure water at a flow rate of 100  $\mu\text{L}/\text{min}$ .

### ToF-SIMS Measurement

A TOF.SIMS 5 (IONTOF GmbH, Germany) was utilized in this study. The SALVI device was assembled on the ToF-SIMS stage before analysis, as shown in Fig. 1b. Specifically, a 25 keV  $\text{Bi}_3^+$  primary ion beam with a spatial resolution of 400 nm and a beam current of 1.0 pA at a cycle time of 100  $\mu\text{s}$  was used. As shown in Fig. 1c, a long pulse width (180 ns, in Region I, with higher intensity but lower mass resolution, *i.e.*,  $\sim 100$ ) was applied for punching through the SiN membrane. Once the detection area of 2  $\mu\text{m}$  in diameter was formed<sup>14, 15</sup> and the SIMS depth profile became steady for about 100 s, a short pulse width (80 ns, with lower intensity but higher mass resolution, *i.e.*,  $\sim 400$ ) was applied for collecting spectrum data for at least 200 s in Region II. Raw data were reduced using the SurfaceLab 6 software (IONTOF GmbH, Germany). The SIMS data were mass calibrated using  $\text{CH}_3^+$ ,  $\text{C}_2\text{H}_5^+$ ,  $\text{C}_3\text{H}_7^+$ ,  $\text{C}_4\text{H}_9^+$  peaks for the positive ion mode spectra; and  $\text{CH}^-$ ,  $\text{C}_2\text{H}^-$ ,  $\text{C}_3\text{H}^-$ ,  $\text{C}_4\text{H}^-$  peaks for the negative ion mode spectra. MATLAB R2105b (MathWorks, USA) was utilized for spectral principal component analysis (PCA).<sup>7-13, 16, 17</sup> Specific peaks were selected for spectral PCA, as shown in Table S1 and S2. Prior to PCA, the  $m/z$  peaks were normalized to  $\text{H}^+$  counts in the positive ion mode and  $\text{H}^-$  counts in the negative ion mode, respectively. Data were then square-root transformed and meancentered before the PCA.

### XPS Experimental Description

XPS data were acquired using a Physical Electronics Quantera Scanning X-ray Microprobe. A focused monochromatic Al K $\alpha$  X-ray (1486.7 eV) excitation source and a spherical section analyzer were used in this system. The instrument had a multi-channel inspection system capable of detection of 32 elements. The X-ray beam was perpendicular to the sample and the photoelectron detector was offset from the normal by 45°. By using a pass-energy of 69.0 eV, high energy resolution spectra were collected in steps of 0.125 eV. A FWHM of 0.92 eV  $\pm$  0.05 eV was induced by the Ag 3d $_{5/2}$  line. Calibration of the binding energy (BE) scale was conducted using ISO 15472 Ed. 2 Surface Chemical Analysis - XPS - Calibration of energy scales. The Cu 2p $_{3/2}$  feature and Au 4f $_{7/2}$  line were set at 932.62  $\pm$  0.05 eV and 83.96  $\pm$  0.05 eV, respectively. Quantification was performed using the Multi Pak software version 9.1.1.7 (Ulvac-phi Inc.).

## SUPPLEMENTARY FIGURES

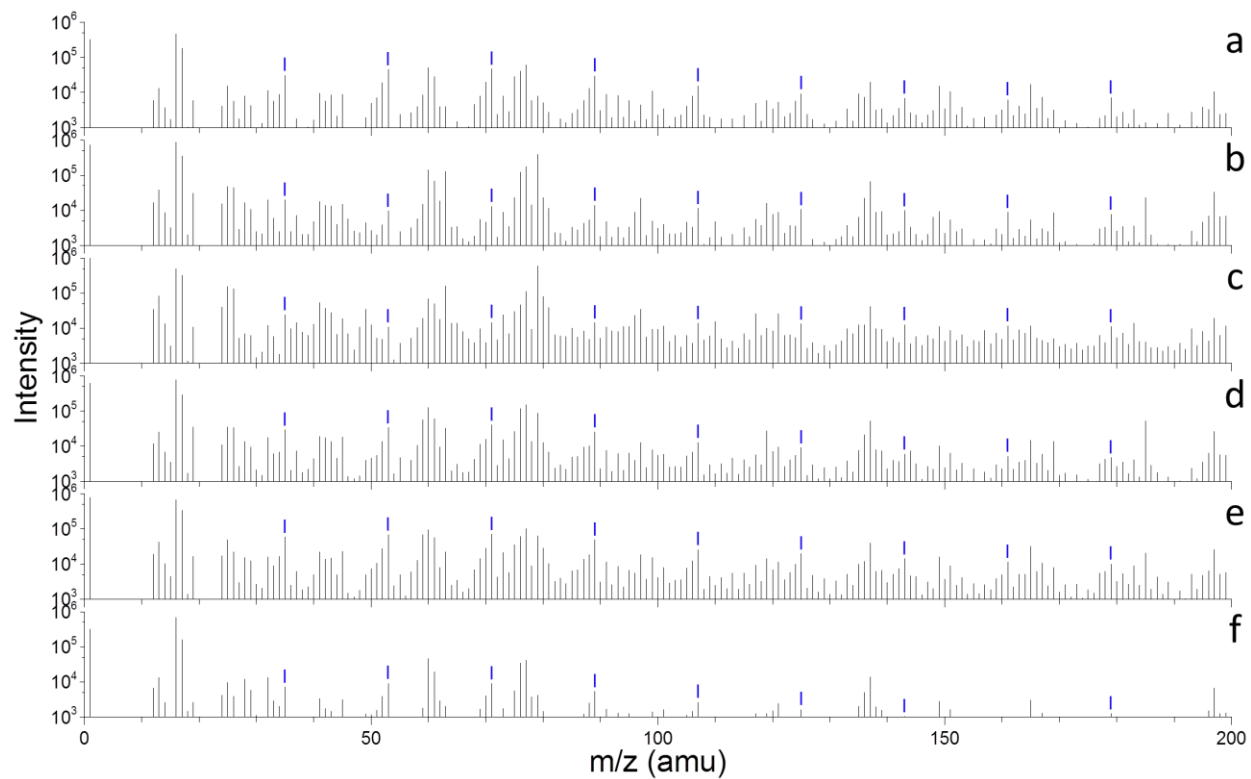

**Fig. S1** ToF-SIMS spectra ( $m/z$  1-200) of six samples: (a) BSA, (b) collagen, (c) fibronectin, (d) laminin, (e) vitronectin, (f) pure water in the negative ion mode. Water clusters were marked with blue labels.

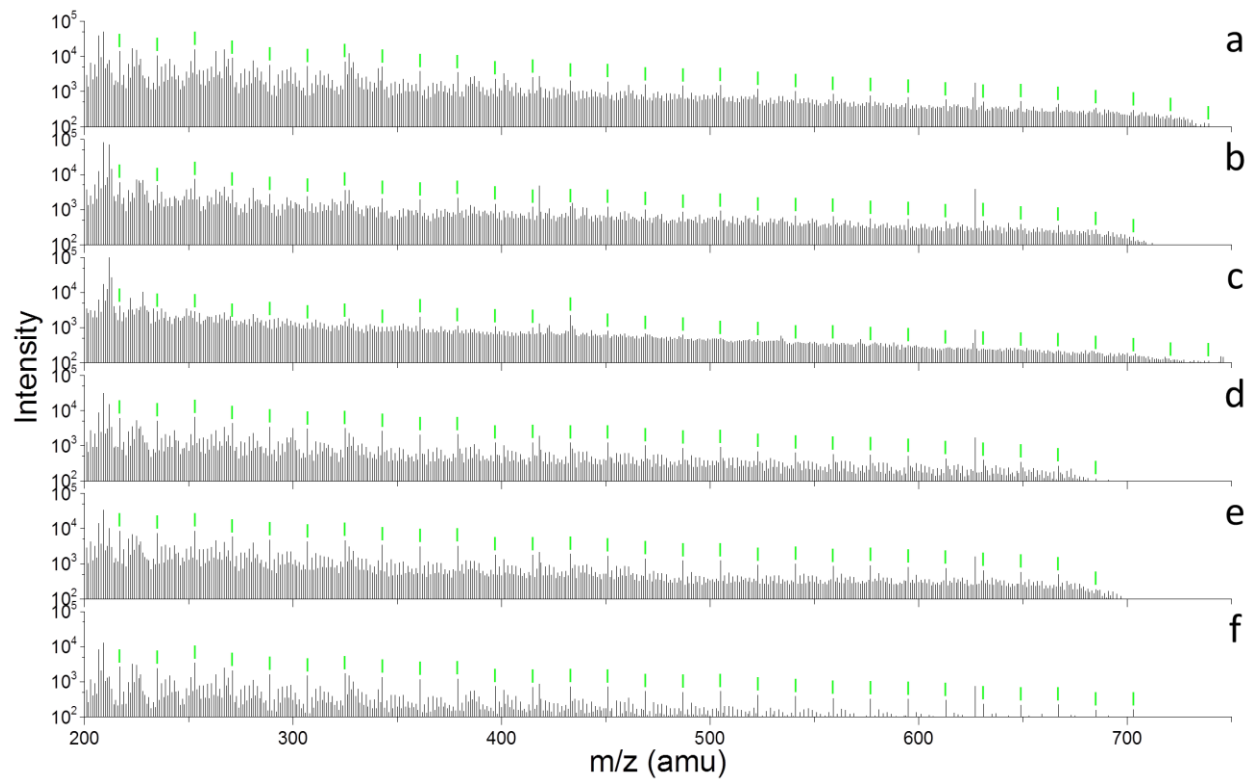

**Fig. S2** ToF-SIMS spectra (m/z 201-750) of six samples: (a) BSA, (b) collagen, (c) fibronectin, (d) laminin, (e) vitronectin, (f) pure water in the positive ion mode. Water clusters were marked with green labels.

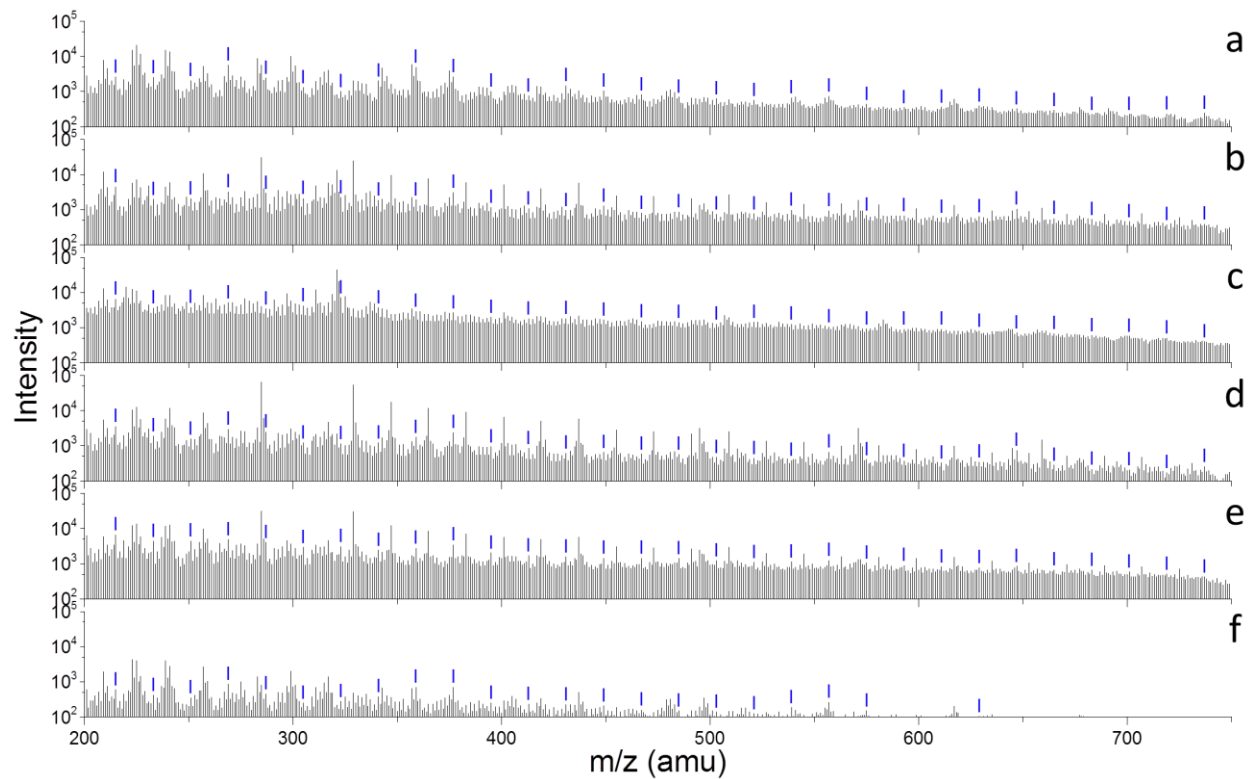

**Fig. S3** ToF-SIMS spectra (m/z 201-750) of six samples: (a) BSA, (b) collagen, (c) fibronectin, (d) laminin, (e) vitronectin, (f) pure water in the negative ion mode. Water clusters were marked with blue labels.



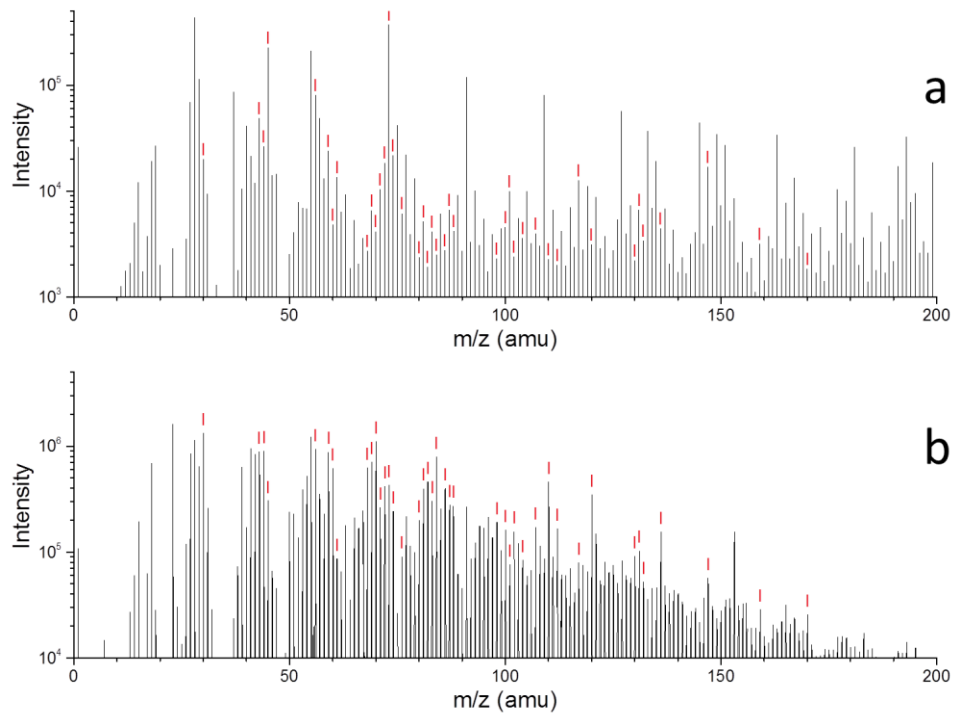

**Fig. S4** ToF-SIMS spectra ( $m/z$  1-200) of (a) hydrated BSA film and (b) dry BSA in the positive ion mode. Amino acid fragments were marked with red labels.

The hydrated BSA sample was analyzed using liquid SIMS with high spatial resolution and the dry BSA was analyzed using high mass resolution (*i.e.*,  $\sim 12000$ ). This comparison shows that key peaks of amino acid fragments were observed in the hydrated and dry BSA samples, although observations of water clusters were not possible using the dry protein samples because of the nature of the sample preparation process.

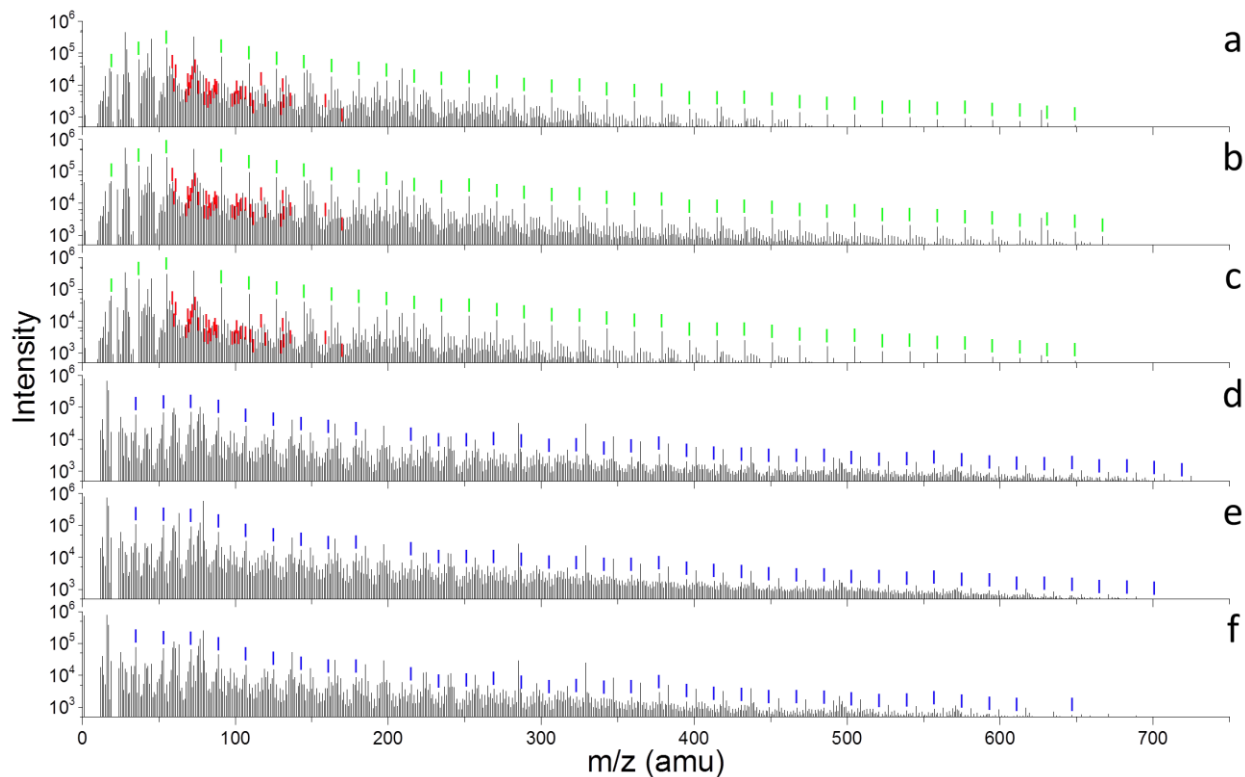

**Fig. S5** ToF-SIMS spectra of hydrated vitronectin film at six different locations: (a), (b), (c) in the positive ion mode and (d), (e), (f) in the negative ion mode. Amino acid fragments were marked with red labels, water clusters were marked with green (in the positive ion mode) and blue (in the negative ion mode) labels.

Data acquired at different locations along the microfluidic channel showed that the reproducibility was reasonable among sampling spots. The counts of water clusters and amino acid fragments from each analysis were comparable.

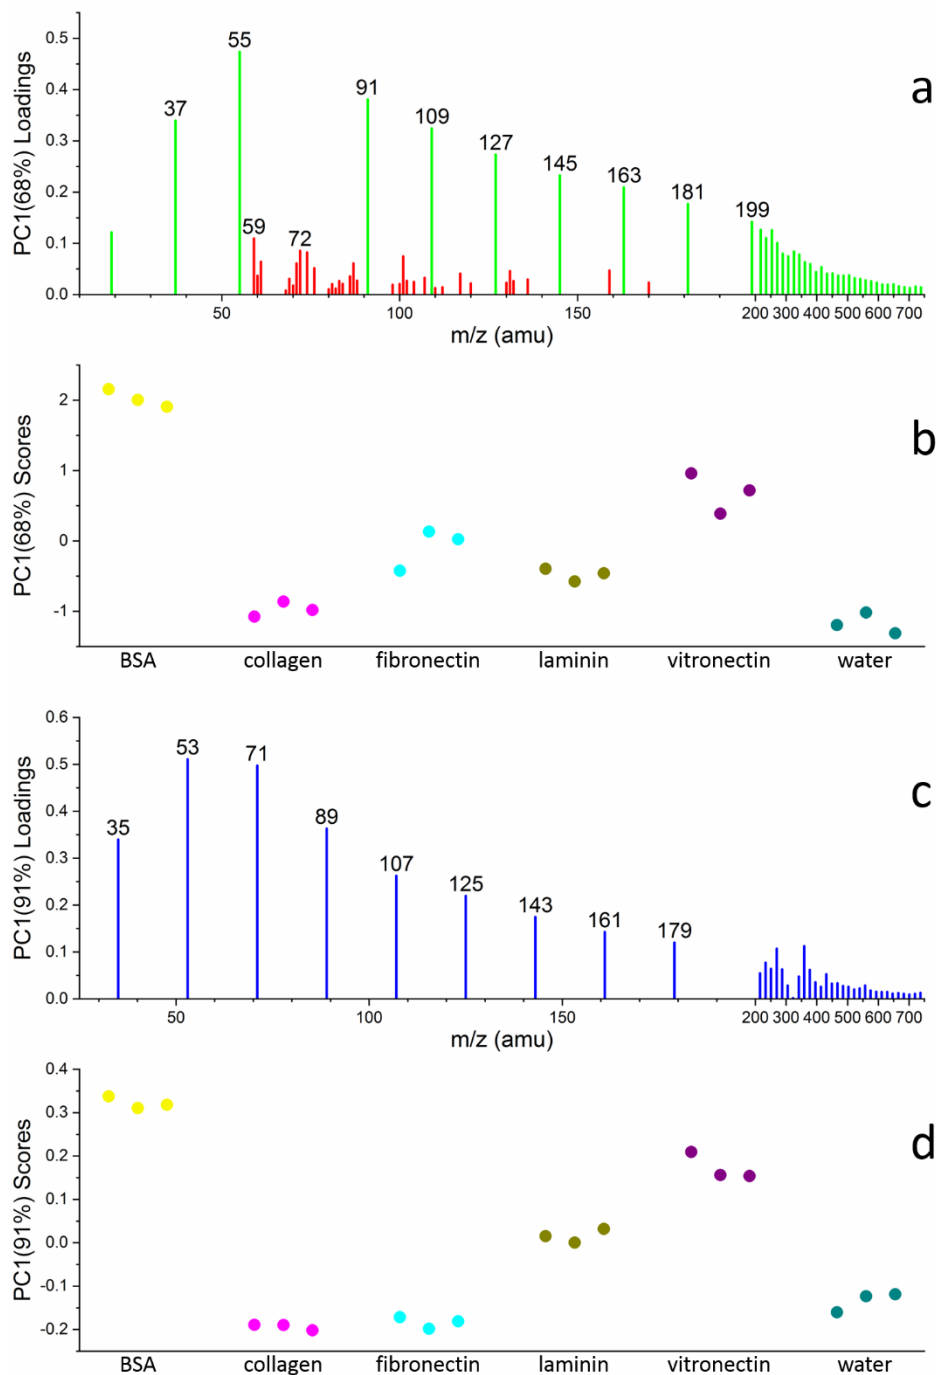

**Fig. S6** Spectral PCA results of six protein samples. (a) PC1 (68%) loading of amino acid fragments (red) and water clusters (green) depicted in Fig. 2 and S2, (b) PC1 (68%) score plot in the positive ion mode; (c) PC1 (91%) loading of water clusters (blue) depicted in Fig. S1 and S3, (d) PC1 (91%) score plot in the negative ion mode.

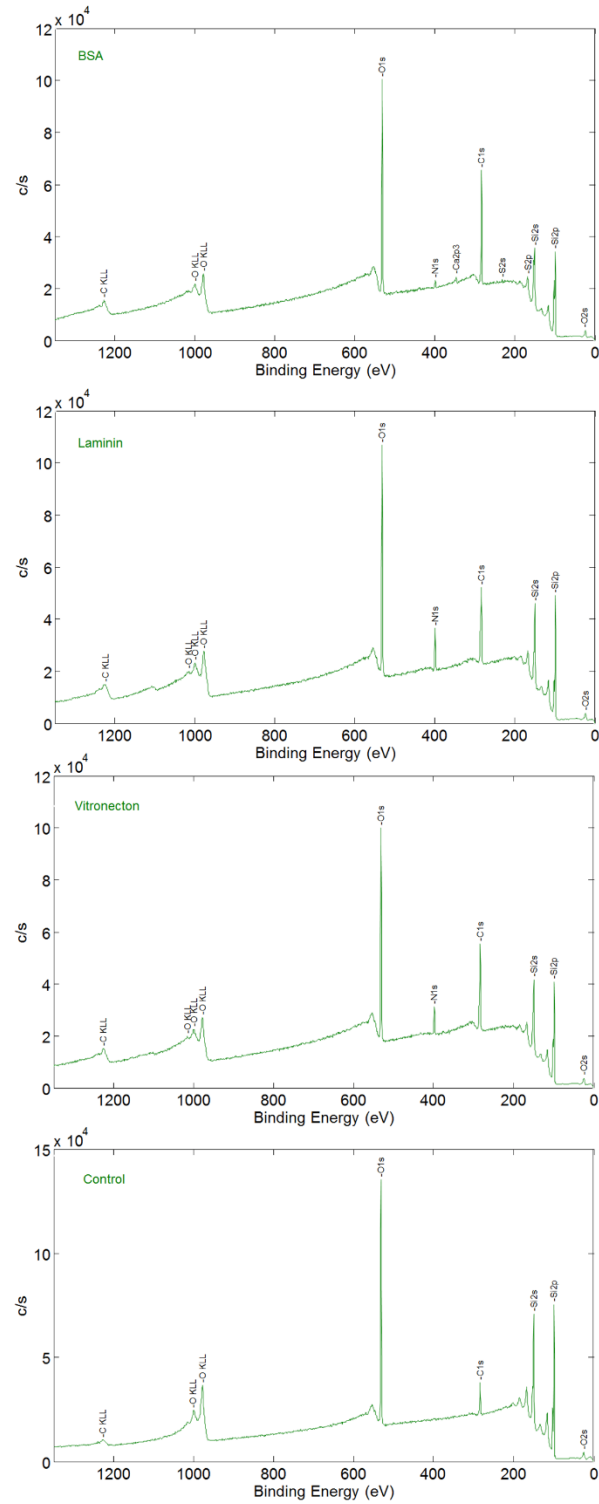

**Fig. S7** Quantitative XPS analysis results of dry protein films.

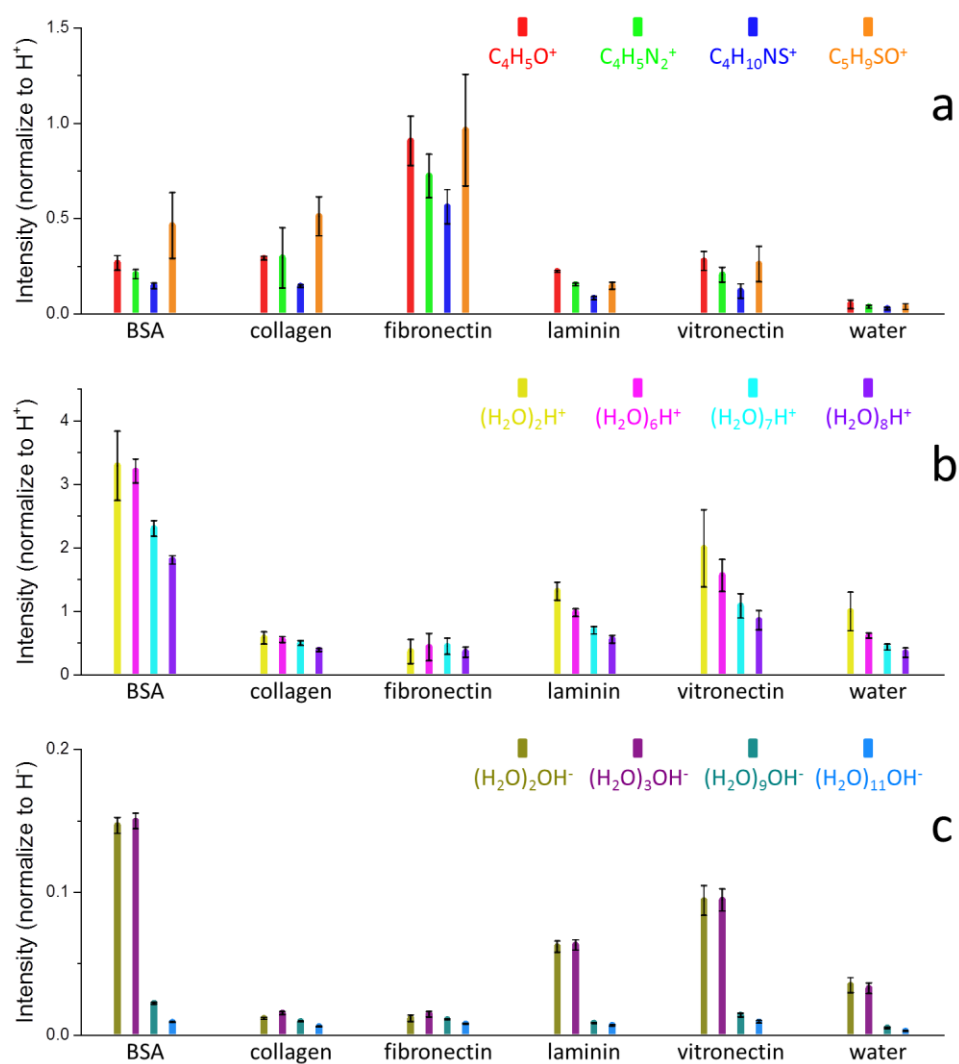

**Fig. S8** Comparison of selected (a) amino acid fragments, (b) positive water clusters and (c) negative water clusters in five hydrated protein films and pure water.

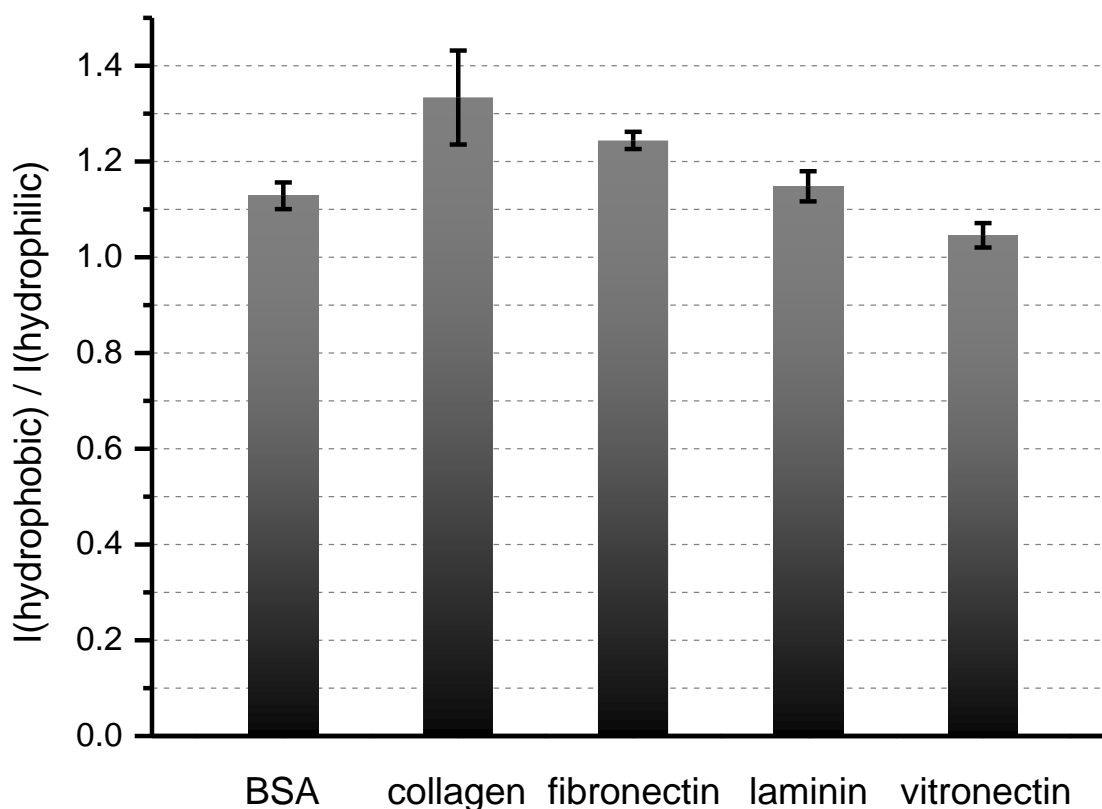

**Fig. S9** Comparison bar plots showing the hydrophobic to hydrophilic amino acid ratios obtained from in situ liquid SIMS in this work.

The ratio of hydrophobic to hydrophilic amino acids follows the same method in J. Baio's paper in 2011.<sup>18</sup> Seven strongest hydrophobic amino acids (6 amino acids and 12 amino acid fragments selected) including the following:

isoleucine [Ile]:  $C_5H_{12}N^+$  (isomer of leucine, same amino acid fragment, not shown in Table S2).

phenylalanine [Phe]:  $C_8H_{10}N^+$ ,  $C_9H_7O^+$ ,  $C_9H_8O^+$

leucine [Leu]:  $C_5H_{12}N^+$

methionine [Met]:  $C_2H_5S^+$ ,  $C_4H_{10}NS^+$ ,  $C_5H_9SO^+$

proline [Pro]:  $C_4H_6N^+$ ,  $C_4H_8N^+$ ,  $C_5H_6N^+$

valine [Val]:  $C_4H_{10}N^+$ ,  $C_5H_7O^+$ .

Alanine [Ala]:  $C_2H_6N^+$  is not included because of concurrence of  $SiNH_2^+$ .

**6 strongest hydrophilic amino acids (12 amino acid fragments selected):**

aspartic acid [Asp]:  $C_3H_6NO_2^+$

arginine [Arg]:  $CH_5N_3^+$ ,  $C_4H_{10}N_3^+$ ,  $C_4H_{11}N_3^+$ ,  $C_5H_{10}N_3^+$

glutamic acid [Glu]:  $C_4H_8NO_2^+$

lysine [Lys]:  $C_5H_{10}N^+$

histidine [His]:  $C_4H_5N_2^+$ ,  $C_4H_6N_2^+$ ,  $C_5H_8N_3^+$

asparagine [Asn]:  $C_3H_7N_2O^+$ ,  $C_4H_4NO_2^+$

During peak selection,  $CH_3N_2^+$  is not included due to interference with  $SiNH^+$ ,  $C_2H_7N_3^+$  is excluded due to interference with  $Si(CH_3)_3^+$  as relevant arginine peaks. The peak of  $C_3H_6N^+$  interfered by  $Si_2^+$  is not selected due to possible interference for lysine.

The ratio calculation results are not in excellent agreement with those from PCA, the reason might be that some amino acid fragments were excluded due to potential interference.

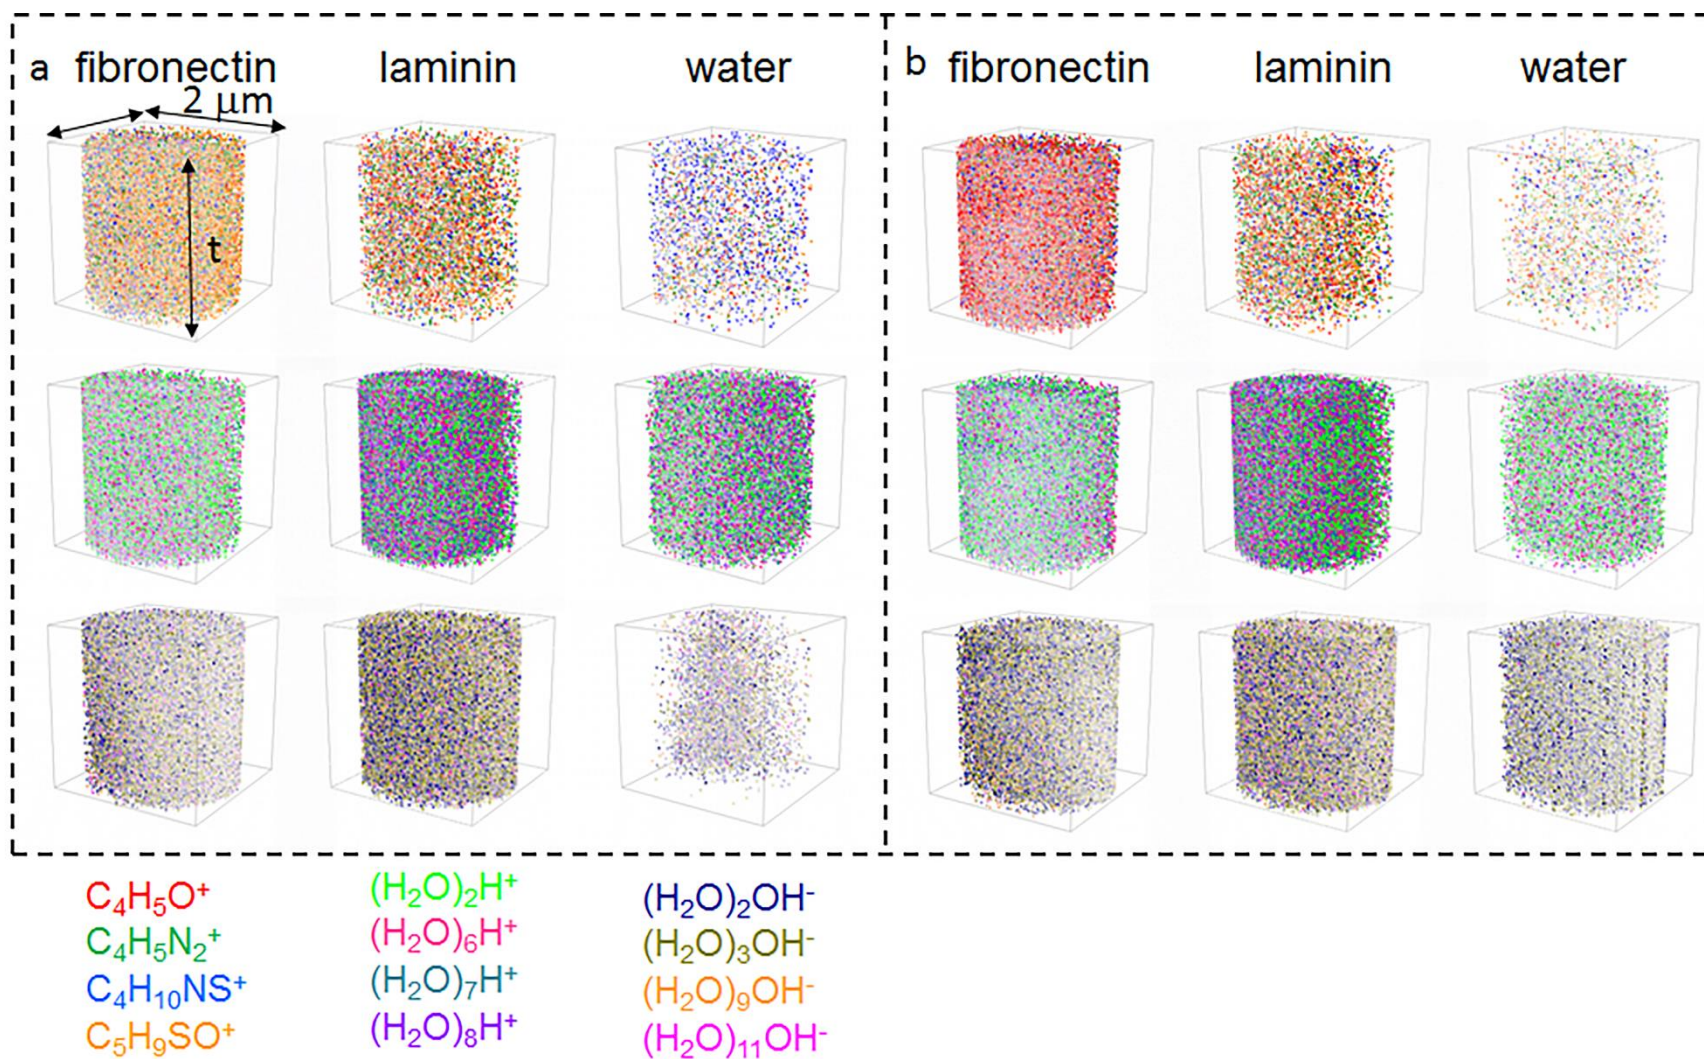

**Fig. S10** 3D reconstructed images from a) absolute counts and b) relative counts normalized to the total ion intensities. The comparisons show that the overall distributions do not vary too much; some ions like water clusters have improved visualization after normalization. Normalization makes more sense for comparison of liquid SIMS data.



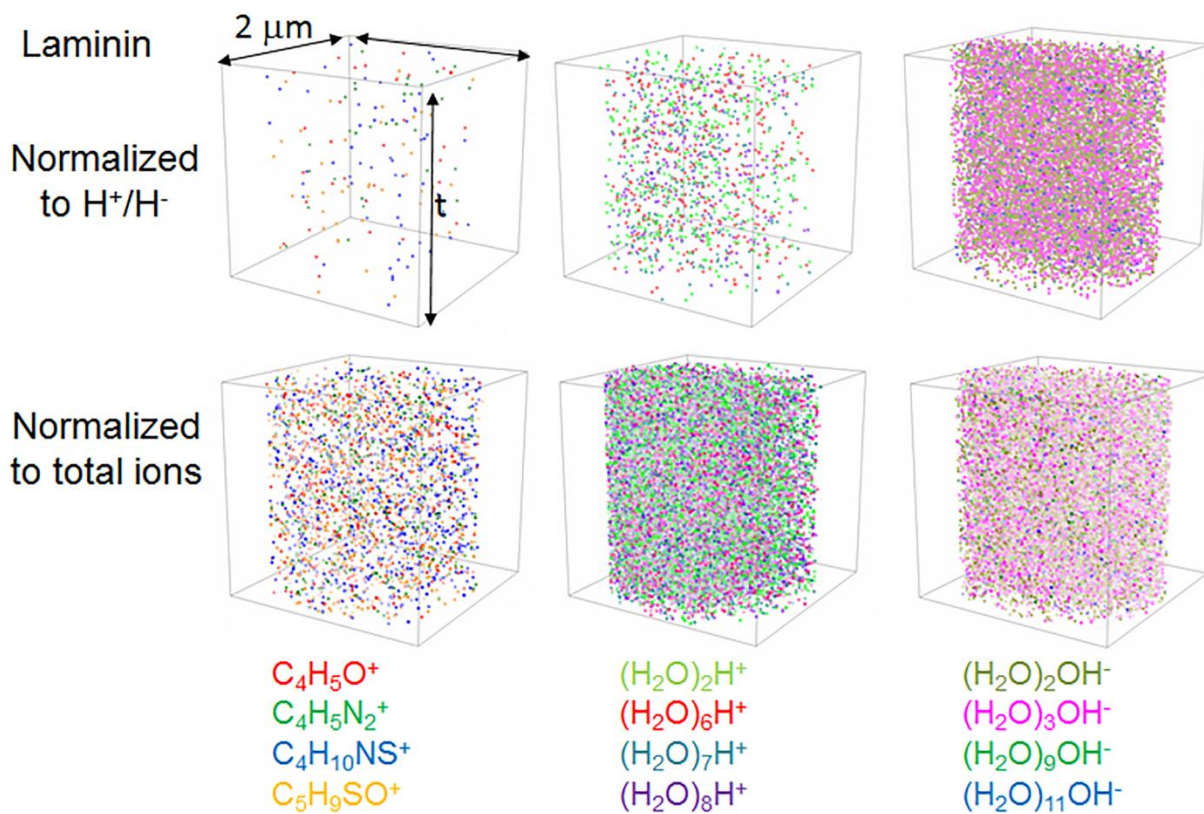

**Fig. S11** 3D reconstructed images of the laminin protein film: a) normalized to  $\text{H}^+$  or  $\text{H}^-$  counts and b) normalized to the total ion intensities.

The comparisons show that normalization to  $\text{H}^+$  or  $\text{H}^-$  does not necessarily give the best presentation of amino acid fragments and some of the water clusters. Normalization to the total ions gives better results.

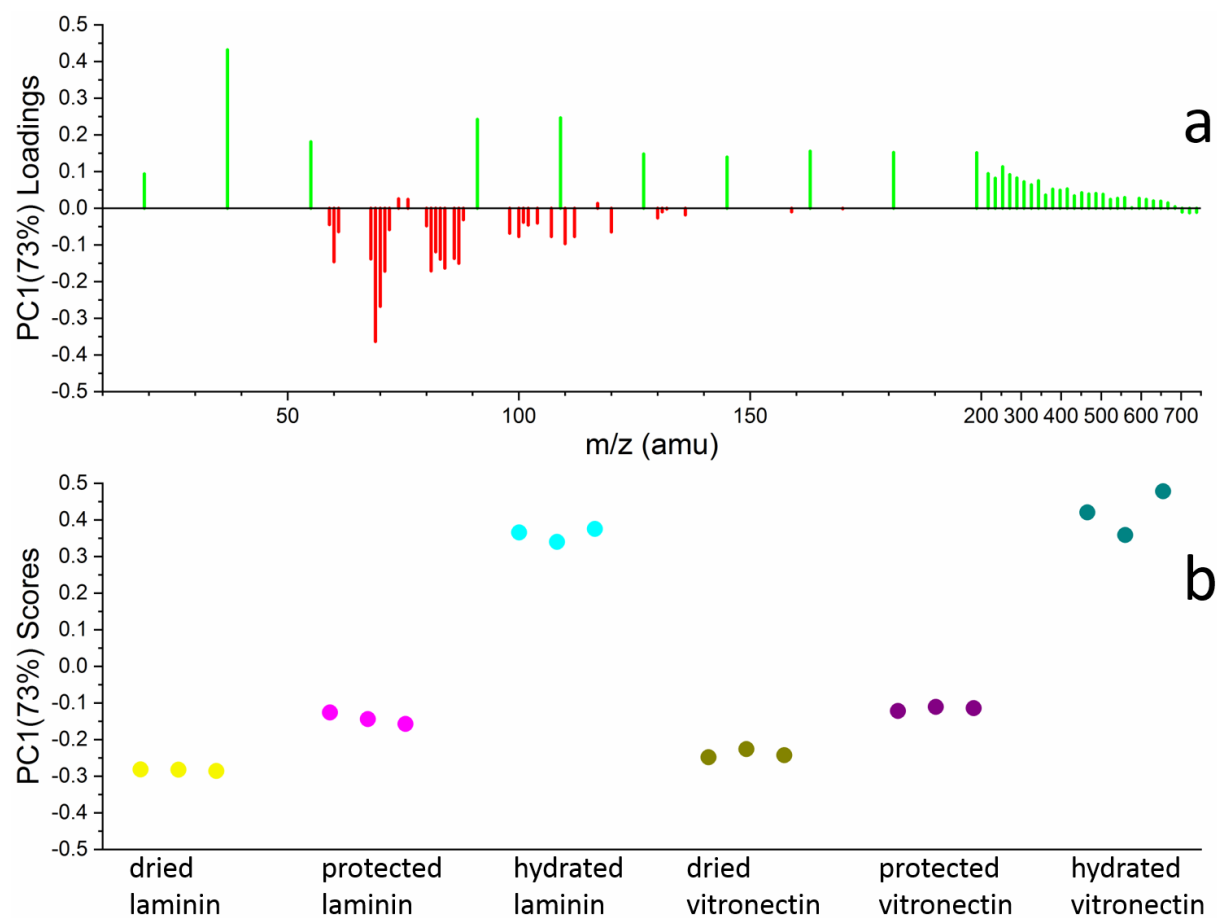

**Fig. S12** PCA results of six samples. (a) PC1 (73%) loadings of amino acid fragments (red) and water clusters (green), (b) PC1 (73%) scores of six samples.

For both laminin and vitronectin, the scores were in the following order: dried protein film < trehalose protected protein film < hydrated protein film. Such result indicated that the degree of protein denaturation would decrease in the order: dried protein film > trehalose protected protein > hydrated protein.

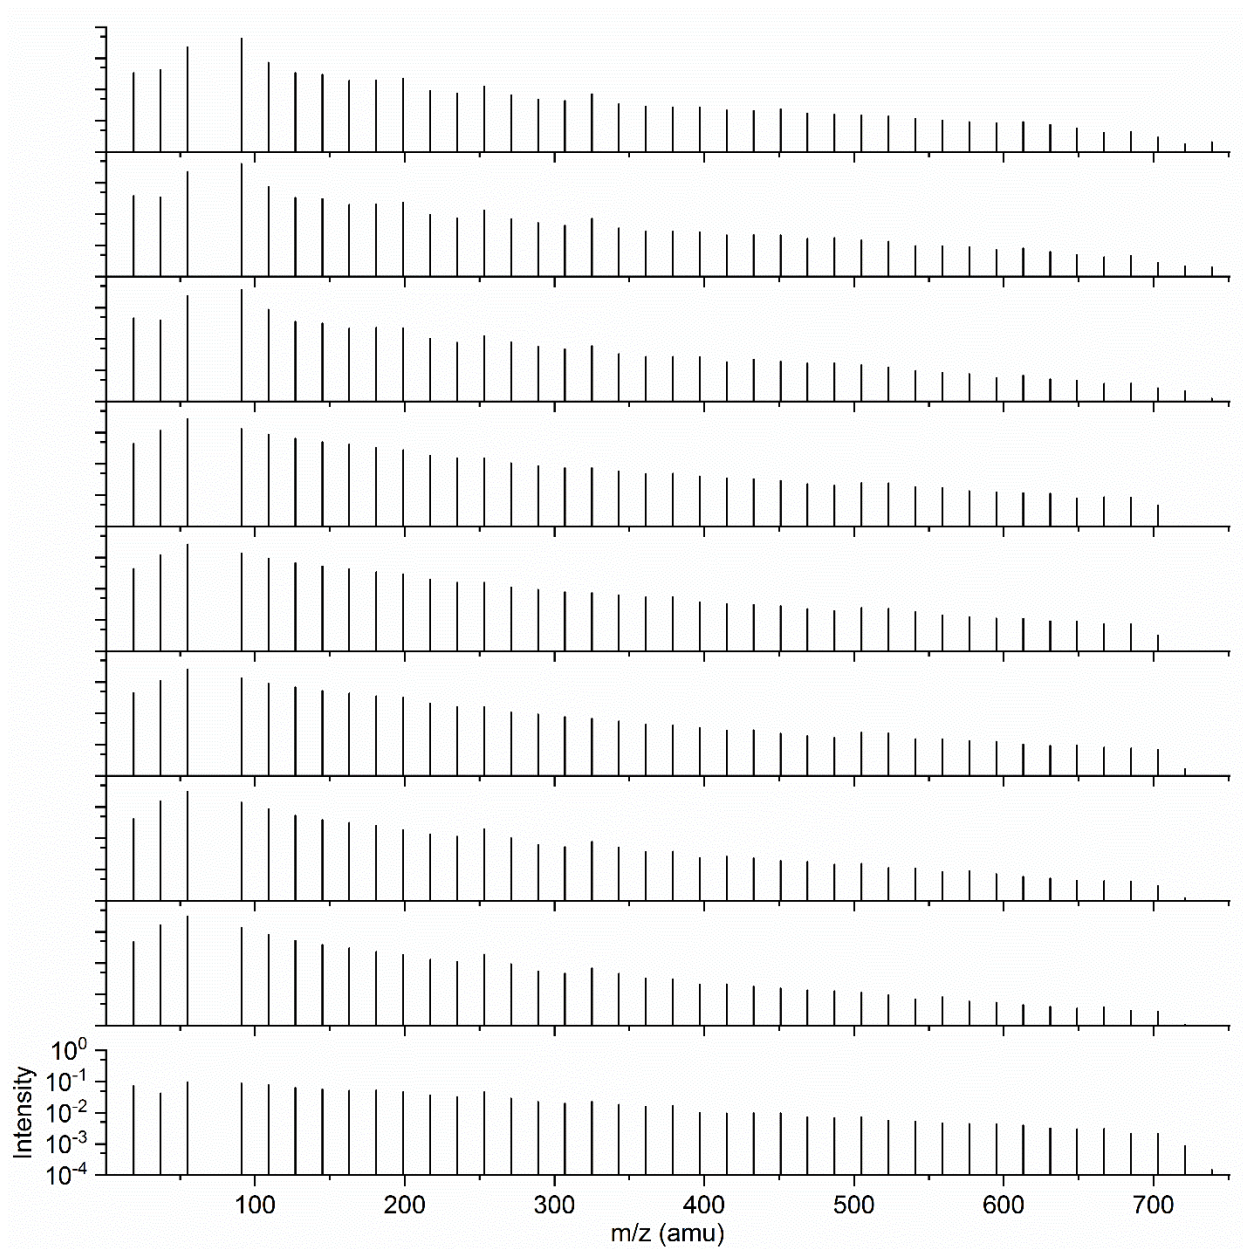

**Fig. S13a** ToF-SIMS spectra of 9 water replicates. Only water clusters were selected and showed, the intensities were normalized to sum of selected peak intensities.

There is no obvious difference among the replicates as a semi-quantitative technique, and the measurement reproducibility was illustrated. In the main text, fewer replicates for each sample were used.

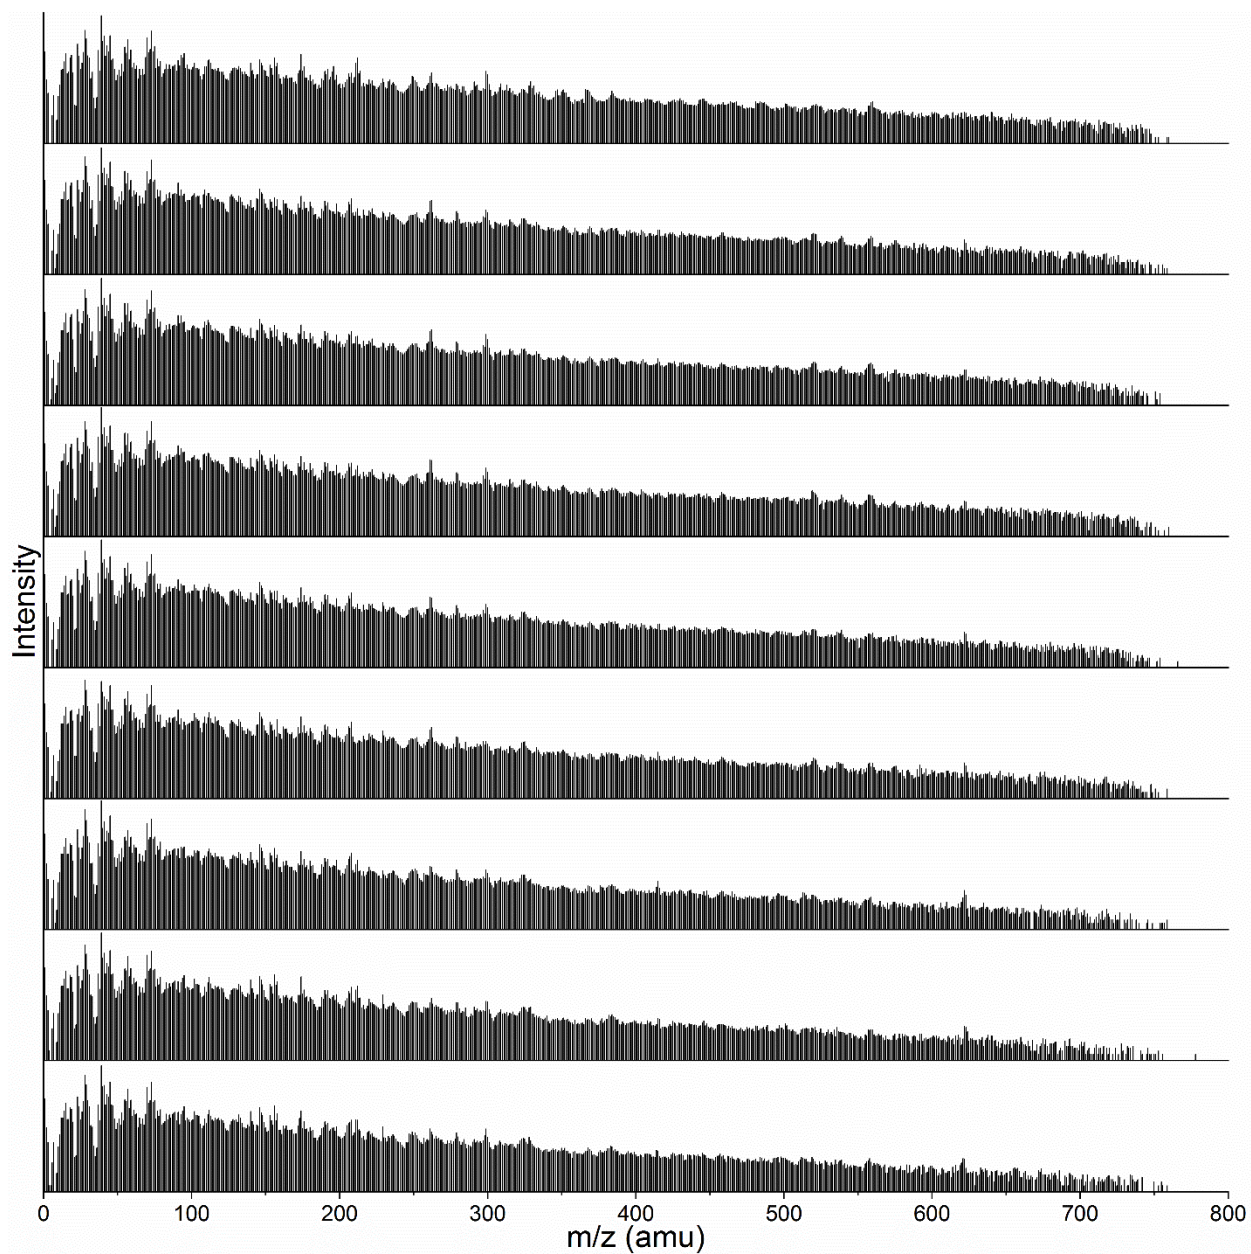

**Fig. S13b** ToF-SIMS spectra of 9 laminin replicates. The intensities were normalized to the total ion intensity.

There is no obvious difference among the replicates using in situ liquid SIMS, and the measurement reproducibility was illustrated. In the main text, fewer replicates for each sample were used.

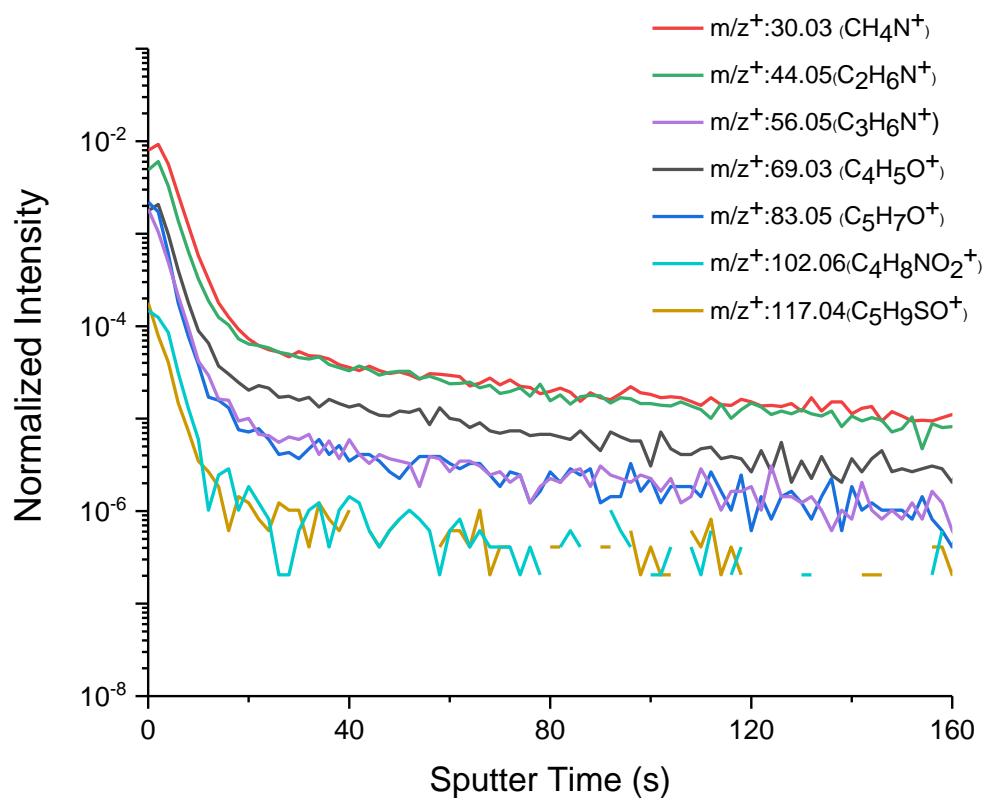

**Fig. S14a.** Depth profiling measurement of the Laminin in the positive mode.

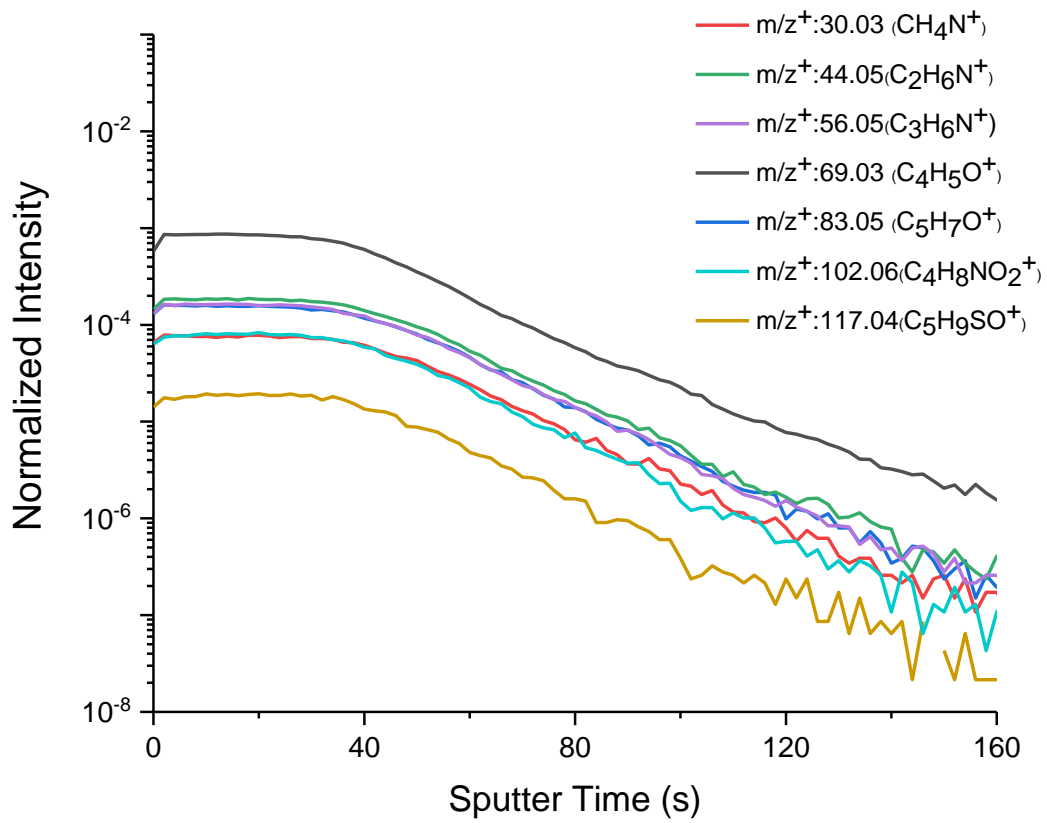

**Fig. S14b.** Depth profiling measurement of the Laminin with trehalose coating in the positive mode.

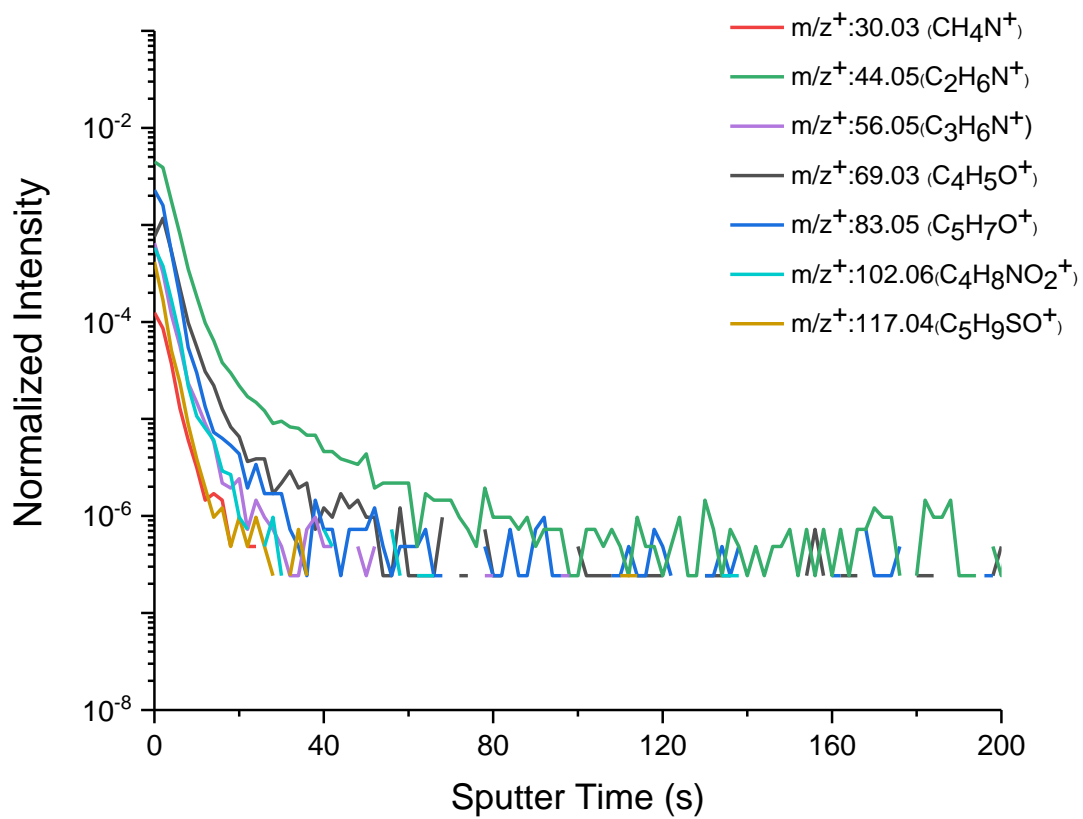

**Fig. S15a.** Depth profiling measurement of the Vitronectin in the positive mode.

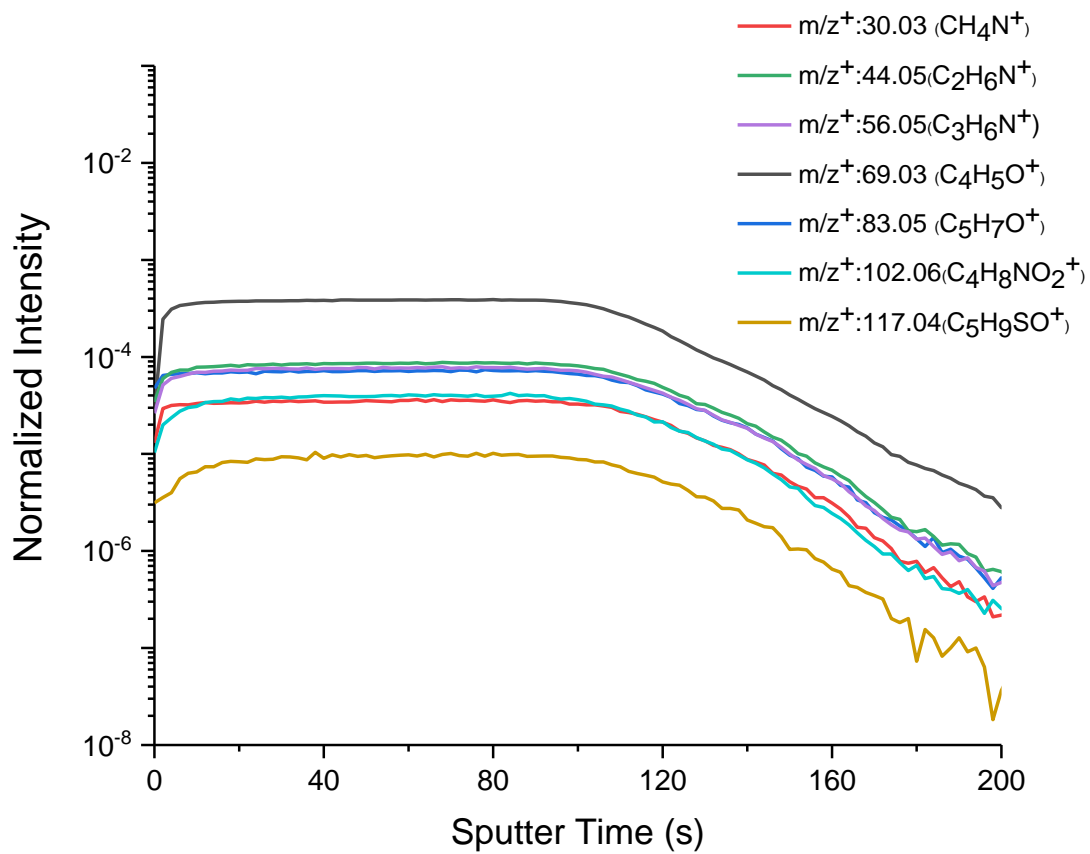

**Fig. S15b.** Depth profiling measurement of the Vitronectin with trehalose coating in the positive mode.



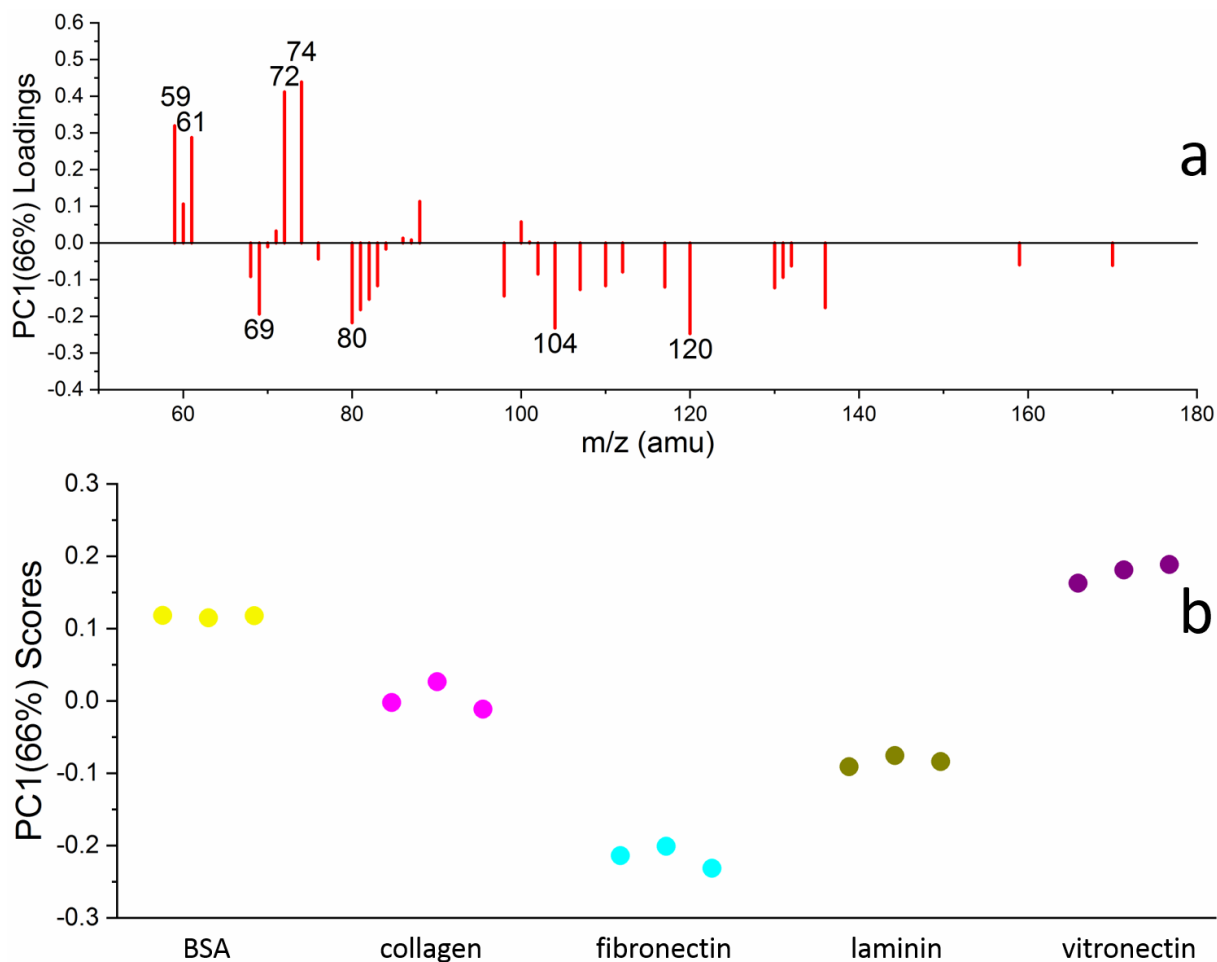

**Fig. S16** PCA results of five samples. (a) PC1 (66%) loadings of amino acid fragments, (b) PC1 (66%) scores of five samples.

The amino acid fragment peaks (set 1, e.g.,  $\text{CH}_5\text{N}_3^+$  m/z 59,  $\text{C}_2\text{H}_5\text{S}^+$  m/z 61,  $\text{C}_4\text{H}_{10}\text{N}^+$  m/z 72,  $\text{C}_3\text{H}_8\text{NO}^+$  m/z 74) have high positive loadings, while the amino acid fragment peaks (set 2, e.g.,  $\text{C}_4\text{H}_5\text{O}^+$  m/z 69,  $\text{C}_3\text{H}_6\text{N}^+$  m/z 80,  $\text{C}_4\text{H}_{10}\text{NS}^+$  m/z 104,  $\text{C}_8\text{H}_{10}\text{N}^+$  m/z 120) have high negative loadings.

The samples with higher PC1 (66%) scores would have higher content of set 1 amino acids, while the samples with lower PC1 (66%) scores would have higher content of set 2 amino acids.

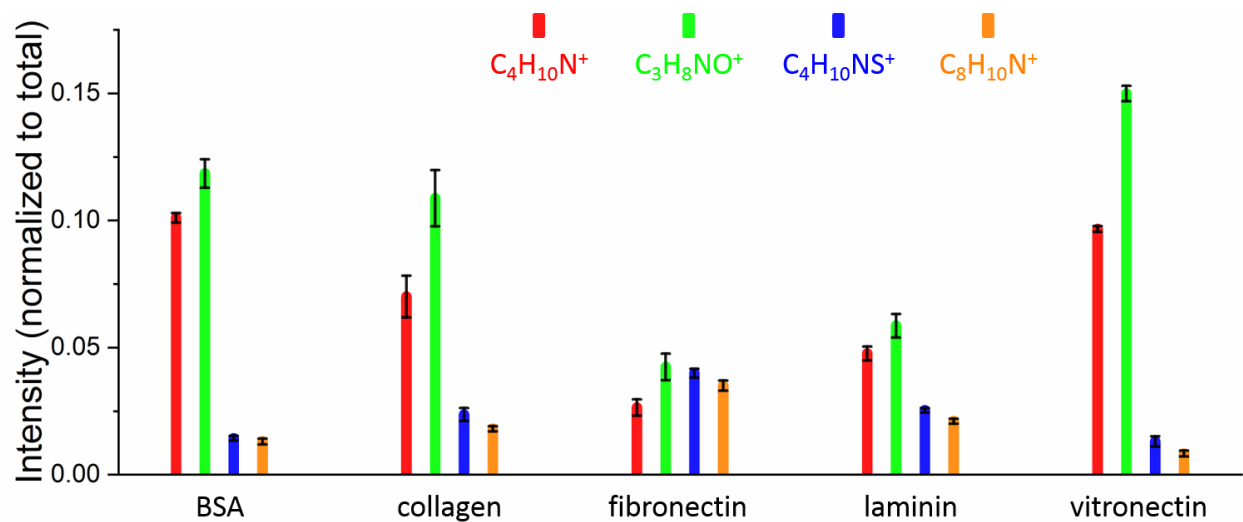

**Fig. S17** Comparison of selected amino acid fragments (normalized to sum of the selected amino acid fragment intensities) in five hydrated protein films.

Four representative amino acids were selected to show the different amino acid compositions between samples. The results were consistent with Fig. S16.

## SUPPLEMENTARY TABLES

**Table S1** Water clusters observed in the positive and negative ion mode in this study.

| positive ion mode                               |     |                                              | negative ion mode                                |     |                                                  |
|-------------------------------------------------|-----|----------------------------------------------|--------------------------------------------------|-----|--------------------------------------------------|
| water cluster                                   | m/z | interference                                 | water cluster                                    | m/z | interference                                     |
| (H <sub>2</sub> O)H <sup>+</sup>                | 19  |                                              | (H <sub>2</sub> O)OH <sup>-</sup>                | 35  |                                                  |
| (H <sub>2</sub> O) <sub>2</sub> H <sup>+</sup>  | 37  |                                              | (H <sub>2</sub> O) <sub>2</sub> OH <sup>-</sup>  | 53  |                                                  |
| (H <sub>2</sub> O) <sub>3</sub> H <sup>+</sup>  | 55  |                                              | (H <sub>2</sub> O) <sub>3</sub> OH <sup>-</sup>  | 71  |                                                  |
| (H <sub>2</sub> O) <sub>4</sub> H <sup>+</sup>  | 73  | SiC <sub>3</sub> H <sub>9</sub> <sup>+</sup> | (H <sub>2</sub> O) <sub>4</sub> OH <sup>-</sup>  | 89  |                                                  |
| (H <sub>2</sub> O) <sub>5</sub> H <sup>+</sup>  | 91  |                                              | (H <sub>2</sub> O) <sub>5</sub> OH <sup>-</sup>  | 107 |                                                  |
| (H <sub>2</sub> O) <sub>6</sub> H <sup>+</sup>  | 109 |                                              | (H <sub>2</sub> O) <sub>6</sub> OH <sup>-</sup>  | 125 |                                                  |
| (H <sub>2</sub> O) <sub>7</sub> H <sup>+</sup>  | 127 |                                              | (H <sub>2</sub> O) <sub>7</sub> OH <sup>-</sup>  | 143 |                                                  |
| (H <sub>2</sub> O) <sub>8</sub> H <sup>+</sup>  | 145 |                                              | (H <sub>2</sub> O) <sub>8</sub> OH <sup>-</sup>  | 161 |                                                  |
| (H <sub>2</sub> O) <sub>9</sub> H <sup>+</sup>  | 163 |                                              | (H <sub>2</sub> O) <sub>9</sub> OH <sup>-</sup>  | 179 |                                                  |
| (H <sub>2</sub> O) <sub>10</sub> H <sup>+</sup> | 181 |                                              | (H <sub>2</sub> O) <sub>10</sub> OH <sup>-</sup> | 197 | (SiO <sub>2</sub> ) <sub>3</sub> OH <sup>-</sup> |
| (H <sub>2</sub> O) <sub>11</sub> H <sup>+</sup> | 199 |                                              | (H <sub>2</sub> O) <sub>11</sub> OH <sup>-</sup> | 215 |                                                  |
| (H <sub>2</sub> O) <sub>12</sub> H <sup>+</sup> | 217 |                                              | (H <sub>2</sub> O) <sub>12</sub> OH <sup>-</sup> | 233 |                                                  |
| (H <sub>2</sub> O) <sub>13</sub> H <sup>+</sup> | 235 |                                              | (H <sub>2</sub> O) <sub>13</sub> OH <sup>-</sup> | 251 |                                                  |
| (H <sub>2</sub> O) <sub>14</sub> H <sup>+</sup> | 253 |                                              | (H <sub>2</sub> O) <sub>14</sub> OH <sup>-</sup> | 269 |                                                  |
| (H <sub>2</sub> O) <sub>15</sub> H <sup>+</sup> | 271 |                                              | (H <sub>2</sub> O) <sub>15</sub> OH <sup>-</sup> | 287 |                                                  |
| (H <sub>2</sub> O) <sub>16</sub> H <sup>+</sup> | 289 |                                              | (H <sub>2</sub> O) <sub>16</sub> OH <sup>-</sup> | 305 |                                                  |
| (H <sub>2</sub> O) <sub>17</sub> H <sup>+</sup> | 307 |                                              | (H <sub>2</sub> O) <sub>17</sub> OH <sup>-</sup> | 323 |                                                  |
| (H <sub>2</sub> O) <sub>18</sub> H <sup>+</sup> | 325 |                                              | (H <sub>2</sub> O) <sub>18</sub> OH <sup>-</sup> | 341 |                                                  |
| (H <sub>2</sub> O) <sub>19</sub> H <sup>+</sup> | 343 |                                              | (H <sub>2</sub> O) <sub>19</sub> OH <sup>-</sup> | 359 |                                                  |
| (H <sub>2</sub> O) <sub>20</sub> H <sup>+</sup> | 361 |                                              | (H <sub>2</sub> O) <sub>20</sub> OH <sup>-</sup> | 377 |                                                  |
| (H <sub>2</sub> O) <sub>21</sub> H <sup>+</sup> | 379 |                                              | (H <sub>2</sub> O) <sub>21</sub> OH <sup>-</sup> | 395 |                                                  |
| (H <sub>2</sub> O) <sub>22</sub> H <sup>+</sup> | 397 |                                              | (H <sub>2</sub> O) <sub>22</sub> OH <sup>-</sup> | 413 |                                                  |
| (H <sub>2</sub> O) <sub>23</sub> H <sup>+</sup> | 415 |                                              | (H <sub>2</sub> O) <sub>23</sub> OH <sup>-</sup> | 431 |                                                  |
| (H <sub>2</sub> O) <sub>24</sub> H <sup>+</sup> | 433 |                                              | (H <sub>2</sub> O) <sub>24</sub> OH <sup>-</sup> | 449 |                                                  |
| (H <sub>2</sub> O) <sub>25</sub> H <sup>+</sup> | 451 |                                              | (H <sub>2</sub> O) <sub>25</sub> OH <sup>-</sup> | 467 |                                                  |
| (H <sub>2</sub> O) <sub>26</sub> H <sup>+</sup> | 469 |                                              | (H <sub>2</sub> O) <sub>26</sub> OH <sup>-</sup> | 485 |                                                  |
| (H <sub>2</sub> O) <sub>27</sub> H <sup>+</sup> | 487 |                                              | (H <sub>2</sub> O) <sub>27</sub> OH <sup>-</sup> | 503 |                                                  |
| (H <sub>2</sub> O) <sub>28</sub> H <sup>+</sup> | 505 |                                              | (H <sub>2</sub> O) <sub>28</sub> OH <sup>-</sup> | 521 |                                                  |
| (H <sub>2</sub> O) <sub>29</sub> H <sup>+</sup> | 523 |                                              | (H <sub>2</sub> O) <sub>29</sub> OH <sup>-</sup> | 539 |                                                  |
| (H <sub>2</sub> O) <sub>30</sub> H <sup>+</sup> | 541 |                                              | (H <sub>2</sub> O) <sub>30</sub> OH <sup>-</sup> | 557 |                                                  |
| (H <sub>2</sub> O) <sub>31</sub> H <sup>+</sup> | 559 |                                              | (H <sub>2</sub> O) <sub>31</sub> OH <sup>-</sup> | 575 |                                                  |
| (H <sub>2</sub> O) <sub>32</sub> H <sup>+</sup> | 577 |                                              | (H <sub>2</sub> O) <sub>32</sub> OH <sup>-</sup> | 593 |                                                  |
| (H <sub>2</sub> O) <sub>33</sub> H <sup>+</sup> | 595 |                                              | (H <sub>2</sub> O) <sub>33</sub> OH <sup>-</sup> | 611 |                                                  |
| (H <sub>2</sub> O) <sub>34</sub> H <sup>+</sup> | 613 |                                              | (H <sub>2</sub> O) <sub>34</sub> OH <sup>-</sup> | 629 |                                                  |
| (H <sub>2</sub> O) <sub>35</sub> H <sup>+</sup> | 631 |                                              | (H <sub>2</sub> O) <sub>35</sub> OH <sup>-</sup> | 647 |                                                  |
| (H <sub>2</sub> O) <sub>36</sub> H <sup>+</sup> | 649 |                                              | (H <sub>2</sub> O) <sub>36</sub> OH <sup>-</sup> | 665 |                                                  |
| (H <sub>2</sub> O) <sub>37</sub> H <sup>+</sup> | 667 |                                              | (H <sub>2</sub> O) <sub>37</sub> OH <sup>-</sup> | 683 |                                                  |
| (H <sub>2</sub> O) <sub>38</sub> H <sup>+</sup> | 685 |                                              | (H <sub>2</sub> O) <sub>38</sub> OH <sup>-</sup> | 701 |                                                  |
| (H <sub>2</sub> O) <sub>39</sub> H <sup>+</sup> | 703 |                                              | (H <sub>2</sub> O) <sub>39</sub> OH <sup>-</sup> | 719 |                                                  |
| (H <sub>2</sub> O) <sub>40</sub> H <sup>+</sup> | 721 |                                              | (H <sub>2</sub> O) <sub>40</sub> OH <sup>-</sup> | 737 |                                                  |
| (H <sub>2</sub> O) <sub>41</sub> H <sup>+</sup> | 739 |                                              |                                                  |     |                                                  |

**Table S2** Amino acid fragments observed in the positive ion mode in this study.

| amino acid fragment                                         | amino acid    | exact m/z | m/z (dry) | m/z (hydrated) | interference                                                   |
|-------------------------------------------------------------|---------------|-----------|-----------|----------------|----------------------------------------------------------------|
| CH <sub>4</sub> N <sup>+</sup>                              | glycine       | 30.03     | 30.03     | 30             | SiH <sub>2</sub> <sup>+</sup>                                  |
| CH <sub>3</sub> N <sub>2</sub> <sup>+</sup>                 | arginine      | 43.03     | 43.03     | 43             | SiNH <sup>+</sup>                                              |
| C <sub>2</sub> H <sub>6</sub> N <sup>+</sup>                | alanine       | 44.05     | 44.05     | 44             | SiNH <sub>2</sub> <sup>+</sup>                                 |
| CHS <sup>+</sup>                                            | cysteine      | 44.98     | 44.98     | 45             | SiNH <sub>3</sub> <sup>+</sup>                                 |
| C <sub>3</sub> H <sub>6</sub> N <sup>+</sup>                | lysine        | 56.05     | 56.05     | 56             | Si <sub>2</sub> <sup>+</sup>                                   |
| CH <sub>5</sub> N <sub>3</sub> <sup>+</sup>                 | arginine      | 59.05     | 59.05     | 59             |                                                                |
| C <sub>2</sub> H <sub>6</sub> NO <sup>+</sup>               | serine        | 60.04     | 60.06     | 60             |                                                                |
| C <sub>2</sub> H <sub>5</sub> S <sup>+</sup>                | methionine    | 61.01     | 61.01     | 61             |                                                                |
| C <sub>4</sub> H <sub>6</sub> N <sup>+</sup>                | proline       | 68.05     | 68.05     | 68             |                                                                |
| C <sub>4</sub> H <sub>5</sub> O <sup>+</sup>                | threonine     | 69.03     | 69.04     | 69             |                                                                |
| C <sub>4</sub> H <sub>8</sub> N <sup>+</sup>                | proline       | 70.07     | 70.07     | 70             |                                                                |
| C <sub>3</sub> H <sub>3</sub> O <sub>2</sub> <sup>+</sup>   | serine        | 71.01     | 71.02     | 71             |                                                                |
| C <sub>4</sub> H <sub>10</sub> N <sup>+</sup>               | valine        | 72.08     | 72.09     | 72             |                                                                |
| C <sub>2</sub> H <sub>7</sub> N <sub>3</sub> <sup>+</sup>   | arginine      | 73.06     | 73.07     | 73             | Si(CH <sub>3</sub> ) <sub>3</sub> <sup>+</sup>                 |
| C <sub>3</sub> H <sub>8</sub> NO <sup>+</sup>               | threonine     | 74.06     | 74.07     | 74             |                                                                |
| C <sub>2</sub> H <sub>6</sub> NS <sup>+</sup>               | cysteine      | 76.02     | 76.03     | 76             |                                                                |
| C <sub>5</sub> H <sub>6</sub> N <sup>+</sup>                | proline       | 80.05     | 80.05     | 80             |                                                                |
| C <sub>4</sub> H <sub>5</sub> N <sub>2</sub> <sup>+</sup>   | histidine     | 81.05     | 81.05     | 81             |                                                                |
| C <sub>4</sub> H <sub>6</sub> N <sub>2</sub> <sup>+</sup>   | histidine     | 82.05     | 82.07     | 82             |                                                                |
| C <sub>5</sub> H <sub>7</sub> O <sup>+</sup>                | valine        | 83.05     | 83.06     | 83             |                                                                |
| C <sub>5</sub> H <sub>10</sub> N <sup>+</sup>               | lysine        | 84.08     | 84.09     | 84             |                                                                |
| C <sub>5</sub> H <sub>12</sub> N <sup>+</sup>               | leucine       | 86.10     | 86.10     | 86             |                                                                |
| C <sub>3</sub> H <sub>7</sub> N <sub>2</sub> O <sup>+</sup> | asparagine    | 87.06     | 87.09     | 87             |                                                                |
| C <sub>3</sub> H <sub>6</sub> NO <sub>2</sub> <sup>+</sup>  | aspartic acid | 88.04     | 88.04     | 88             |                                                                |
| C <sub>4</sub> H <sub>4</sub> NO <sub>2</sub> <sup>+</sup>  | asparagine    | 98.02     | 98.02     | 98             |                                                                |
| C <sub>4</sub> H <sub>10</sub> N <sub>3</sub> <sup>+</sup>  | arginine      | 100.09    | 100.09    | 100            |                                                                |
| C <sub>4</sub> H <sub>11</sub> N <sub>3</sub> <sup>+</sup>  | arginine      | 101.10    | 101.08    | 101            |                                                                |
| C <sub>4</sub> H <sub>8</sub> NO <sub>2</sub> <sup>+</sup>  | glutamic acid | 102.06    | 102.06    | 102            |                                                                |
| C <sub>4</sub> H <sub>10</sub> NS <sup>+</sup>              | methionine    | 104.05    | 104.06    | 104            |                                                                |
| C <sub>7</sub> H <sub>7</sub> O <sup>+</sup>                | tyrosine      | 107.05    | 107.05    | 107            |                                                                |
| C <sub>5</sub> H <sub>8</sub> N <sub>3</sub> <sup>+</sup>   | histidine     | 110.07    | 110.08    | 110            |                                                                |
| C <sub>5</sub> H <sub>10</sub> N <sub>3</sub> <sup>+</sup>  | arginine      | 112.09    | 112.09    | 112            |                                                                |
| C <sub>5</sub> H <sub>9</sub> SO <sup>+</sup>               | methionine    | 117.04    | 117.06    | 117            |                                                                |
| C <sub>8</sub> H <sub>10</sub> N <sup>+</sup>               | phenylalanine | 120.08    | 120.09    | 120            |                                                                |
| C <sub>9</sub> H <sub>8</sub> N <sup>+</sup>                | tryptophan    | 130.07    | 130.07    | 130            |                                                                |
| C <sub>9</sub> H <sub>7</sub> O <sup>+</sup>                | phenylalanine | 131.05    | 131.05    | 131            |                                                                |
| C <sub>9</sub> H <sub>8</sub> O <sup>+</sup>                | phenylalanine | 132.06    | 132.06    | 132            |                                                                |
| C <sub>8</sub> H <sub>10</sub> NO <sup>+</sup>              | tyrosine      | 136.08    | 136.08    | 136            |                                                                |
| C <sub>9</sub> H <sub>7</sub> O <sub>2</sub> <sup>+</sup>   | tyrosine      | 147.04    | 147.05    | 147            | Si <sub>2</sub> (CH <sub>3</sub> ) <sub>5</sub> O <sup>+</sup> |
| C <sub>10</sub> H <sub>11</sub> N <sub>2</sub> <sup>+</sup> | tryptophan    | 159.09    | 159.09    | 159            |                                                                |
| C <sub>11</sub> H <sub>8</sub> NO <sup>+</sup>              | tryptophan    | 170.06    | 170.06    | 170            |                                                                |

**Table S3** 95% confidence limits for all the PCA plots

| confidence limits  | <b>Fig. 3b</b>   | <b>Fig. 3d</b>   | <b>Fig. S6b</b>  | <b>Fig. S6d</b>  | <b>Fig. S16b</b> |
|--------------------|------------------|------------------|------------------|------------------|------------------|
| <b>BSA</b>         | [0.022, 0.104]   | [0.019, 0.091]   | [0.701, 3.345]   | [0.112, 0.533]   | [0.041, 0.193]   |
| <b>collagen</b>    | [-0.265, -0.055] | [-0.322, -0.068] | [-1.608, -0.337] | [-0.320, -0.067] | [0.002, 0.007]   |
| <b>fibronectin</b> | [-0.430, -0.090] | [-0.380, -0.080] | [-0.147, -0.031] | [-0.303, -0.064] | [-0.356, -0.075] |
| <b>laminin</b>     | [0.040, 0.192]   | [0.040, 0.192]   | [-0.787, -0.165] | [0.006, 0.026]   | [-0.138, -0.029] |
| <b>vitronectin</b> | [0.031, 0.147]   | [0.033, 0.160]   | [0.239, 1.138]   | [0.060, 0.286]   | [0.062, 0.294]   |
| <b>water</b>       | [0.053, 0.250]   | [0.054, 0.259]   | [-1.941, -0.407] | [-0.222, -0.046] |                  |

| confidence limits            | <b>Fig. S12b</b> |
|------------------------------|------------------|
| <b>dried laminin</b>         | [-0.468, -0.098] |
| <b>protected laminin</b>     | [-0.235, -0.049] |
| <b>hydrated laminin</b>      | [0.125, 0.596]   |
| <b>dried vitronectin</b>     | [-0.395, -0.083] |
| <b>protected vitronectin</b> | [-0.191, -0.040] |
| <b>hydrated vitronectin</b>  | [0.145, 0.693]   |

**Table S4** The relative abundance of PDMS in the liquid SIMS protein spectrum

| PDMS relative ion abundance | <b>1</b> | <b>2</b> | <b>3</b> |
|-----------------------------|----------|----------|----------|
| <b>BSA</b>                  | 1.91%    | 1.83%    | 1.88%    |
| <b>collagen</b>             | 2.31%    | 2.55%    | 2.37%    |
| <b>fibronectin</b>          | 1.04%    | 1.28%    | 1.15%    |
| <b>laminin</b>              | 1.98%    | 2.20%    | 2.18%    |
| <b>vitronectin</b>          | 2.31%    | 2.19%    | 2.07%    |
| <b>water</b>                | 1.51%    | 1.82%    | 1.55%    |

**Table S5** The XPS determined composition of BSA, laminin, and vitronectin films absorbed onto clean Si substrates

| Protein     | Carbon (at%) | Nitrogen (at%) | Oxygen (at%) | Si (at%) |
|-------------|--------------|----------------|--------------|----------|
| BSA         | 36.0±2.2     | 1.5±0.3        | 32.0±0.7     | 30.6±1.3 |
| Laminin     | 33.2±1.4     | 5.6±0.3        | 31.3±0.6     | 29.8±1.0 |
| Vitronectin | 36.3±4.2     | 3.4±0.2        | 31.1±0.9     | 29.2±3.1 |
| Si control  | 17.1±1.8     | 0.0±0.0        | 38.4±0.6     | 44.4±1.2 |

**MOVIE CAPTION**

**Movie S1** Merged 3D illustrations of selected positive amino acid fragments, positive water clusters, and negative water clusters from hydrated fibronectin film, hydrated laminin film, and pure water. Data were reconstructed from Region II in Fig. 1c.



## REFERENCES

1. L. Yang, X.-Y. Yu, Z. Zhu, T. Thevuthasan and J. P. Cowin, *J. Vac. Sci. Technol., A*, 2011, **29**, 061101.
2. L. Yang, Z. Zhu, X.-Y. Yu, S. Thevuthasan and J. P. Cowin, *Anal. Methods*, 2013, **5**, 2515-2522.
3. X. Hua, M. J. Marshall, Y. Xiong, X. Ma, Y. Zhou, A. E. Tucker, Z. Zhu, S. Liu and X.-Y. Yu, *Biomicrofluidics*, 2015, **9**, 031101.
4. X. Hua, X.-Y. Yu, Z. Wang, L. Yang, B. Liu, Z. Zhu, A. E. Tucker, W. B. Chrisler, E. A. Hill, T. Thevuthasan, Y. Lin, S. Liu and M. J. Marshall, *Analyst*, 2014, **139**, 1609-1613.
5. J. Yu, Y. Zhou, X. Hua, Z. Zhu and X.-Y. Yu, *J. Visualized Exp.*, 2016, e53708.
6. J. J. Gray, *Curr. Opin. Struct. Biol.*, 2004, **14**, 110-115.
7. N. Xia, C. J. May, S. L. McArthur and D. G. Castner, *Langmuir*, 2002, **18**, 4090-4097.
8. M. S. Wagner, T. A. Horbett and D. G. Castner, *Langmuir*, 2003, **19**, 1708-1715.
9. J. Wald, C. Muller, M. Wahl, W. Hoth-Hannig, M. Hannig, M. Kopnarski and C. Ziegler, *Phys. Status Solidi A*, 2010, **207**, 831-836.
10. C. Bruning, S. Hellweg, S. Dambach, D. Lipinsky and H. F. Arlinghaus, *Surf. Interface Anal.*, 2006, **38**, 191-193.
11. O. D. Sanni, M. S. Wagner, D. Briggs, D. G. Castner and J. C. Vickerman, *Surf. Interface Anal.*, 2002, **33**, 715-728.
12. M. S. Wagner and D. G. Castner, *Langmuir*, 2001, **17**, 4649-4660.
13. S. Muramoto, D. J. Graham, M. S. Wagner, T. G. Lee, D. W. Moon and D. G. Castner, *J. Phys. Chem. C*, 2011, **115**, 24247-24255.
14. L. Yang, X.-Y. Yu, Z. Zhu, M. J. Iedema and J. P. Cowin, *Lab Chip*, 2011, **11**, 2481-2484.
15. L. Yang, Z. Zhu, X.-Y. Yu, E. Rodek, L. Saraf, T. Thevuthasan and J. P. Cowin, *Surf. Interface Anal.*, 2014, **46**, 224-228.
16. L. Baugh, T. Weidner, J. E. Baio, P. C. T. Nguyen, L. J. Gamble, P. S. Slayton and D. G. Castner, *Langmuir*, 2010, **26**, 16434-16441.
17. H. Wang, D. G. Castner, B. D. Ratner and S. Y. Jiang, *Langmuir*, 2004, **20**, 1877-1887.
18. J. E. Baio, T. Weidner, G. Interlandi, C. Mendoza-Barrera, H. E. Canavan, R. Michel and D. G. Castner, *Journal of vacuum science & technology. B, Microelectronics and nanometer structures : processing, measurement, and phenomena : an official journal of the American Vacuum Society*, 2011, **29**, 4D113-114D113.
